# Supplementary material
Source: publisher figshare collection journal article supplement (https://gsapubs.figshare.com/articles/dataset/_/20504514)

Val, P., and Willenbring, J.K., 2022, Across-strike asymmetry of the Andes orogen linked to the age and geometry of the Nazca plate: Geology, v. 50, https://doi.org/10.1130/G50545.1

Supplemental Dataset S3 for

**Across-strike asymmetry of the Andes orogen linked to the age and geometry of the Nazca plate**

*Pedro Val1,2*, Jane K. Willenbring1,3*

*1 Scripps Institution of Oceanography, University of California San Diego, La Jolla, CA 92093, USA.*

*2 Now at Department of Geology, School of Mines, Federal University of Ouro Preto, Ouro Preto, MG, Brazil*

*3 Now at Stanford University, Department of Geological Sciences, Stanford, CA 94305, USA*

*Corresponding author: [pedroval07@gmail.com](mailto:pedroval07@gmail.com)

This Supplemental Material contains: SWATH PROFILES


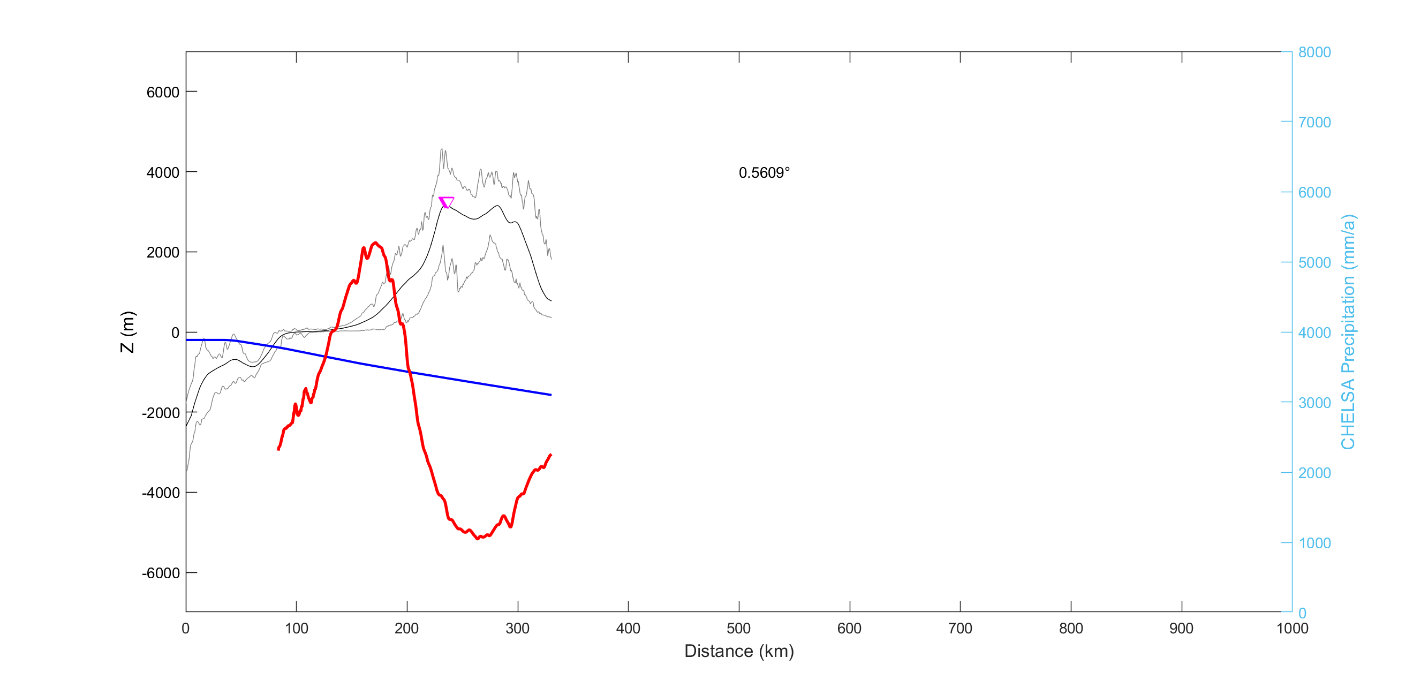

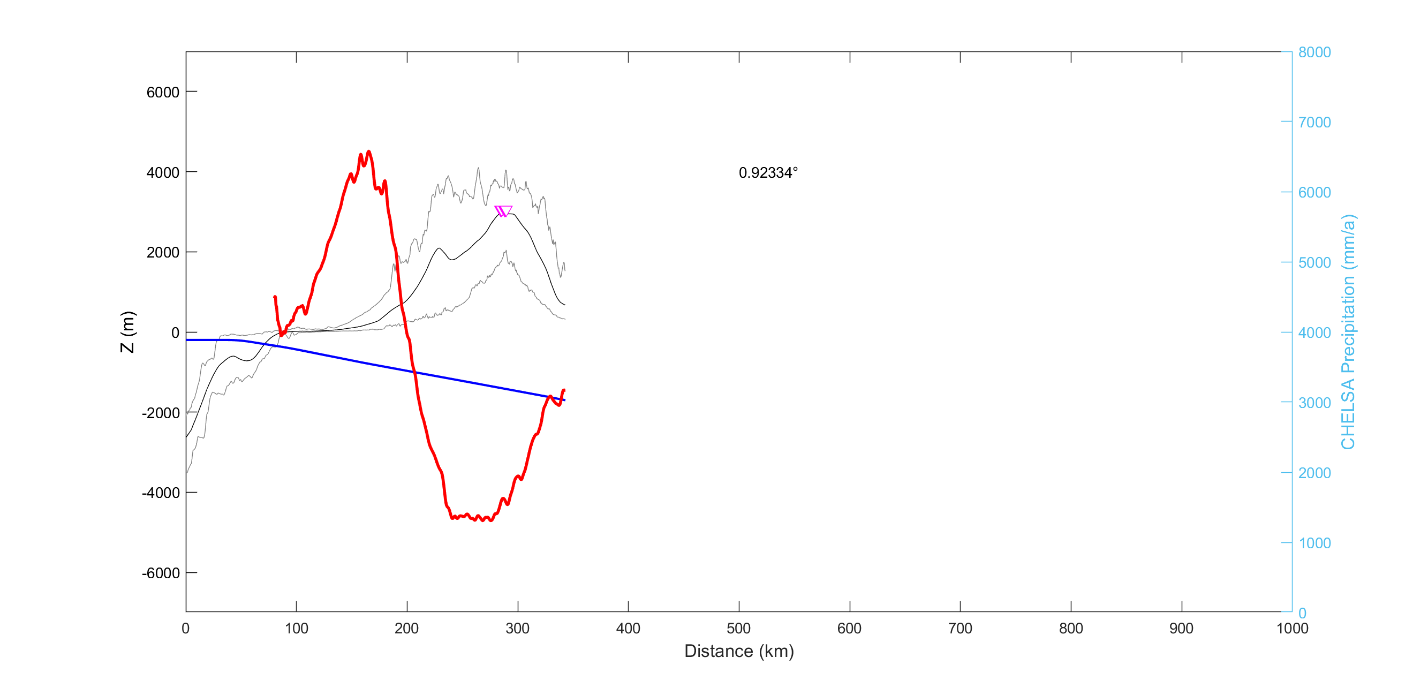

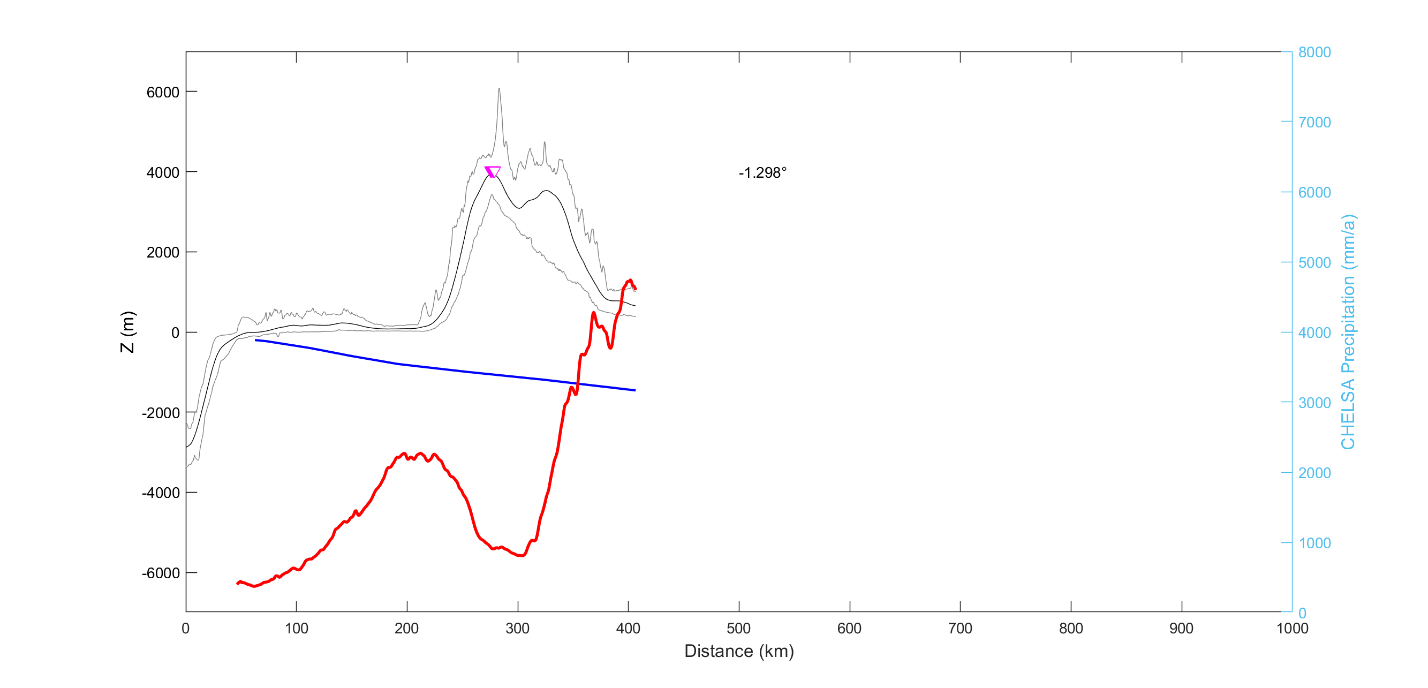

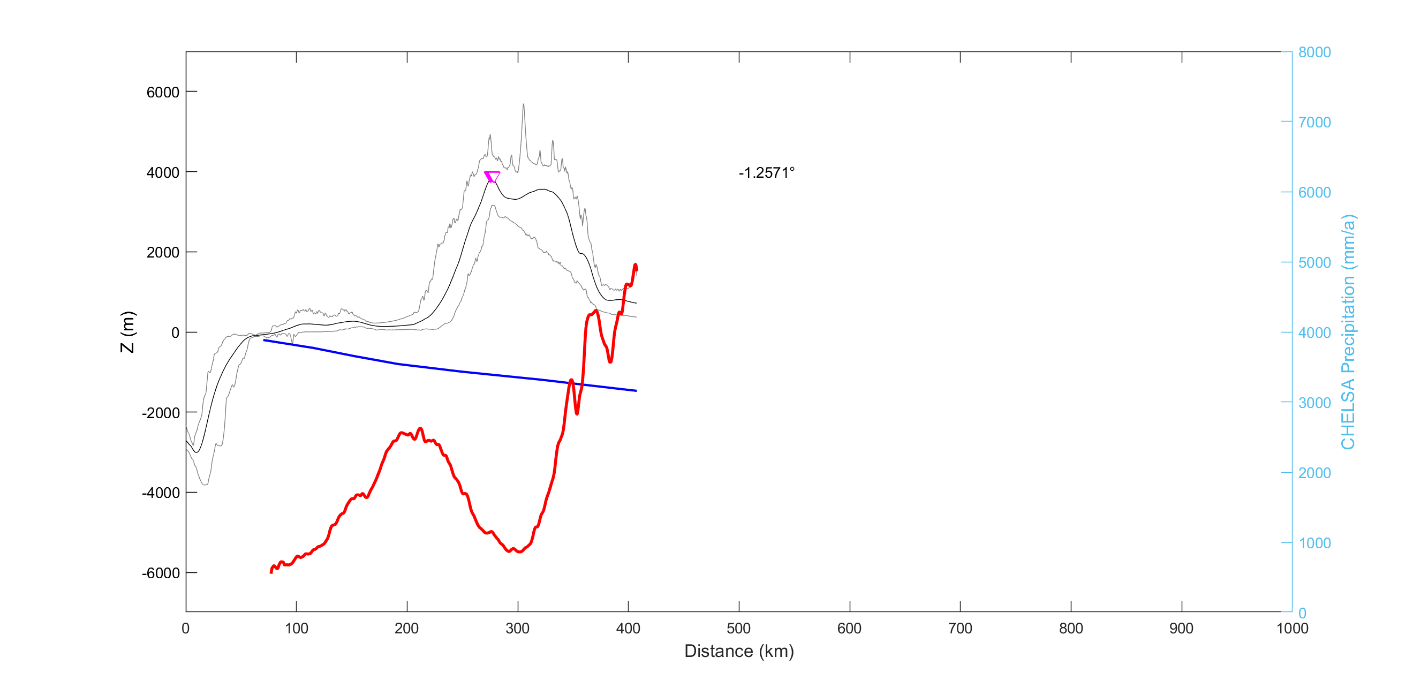

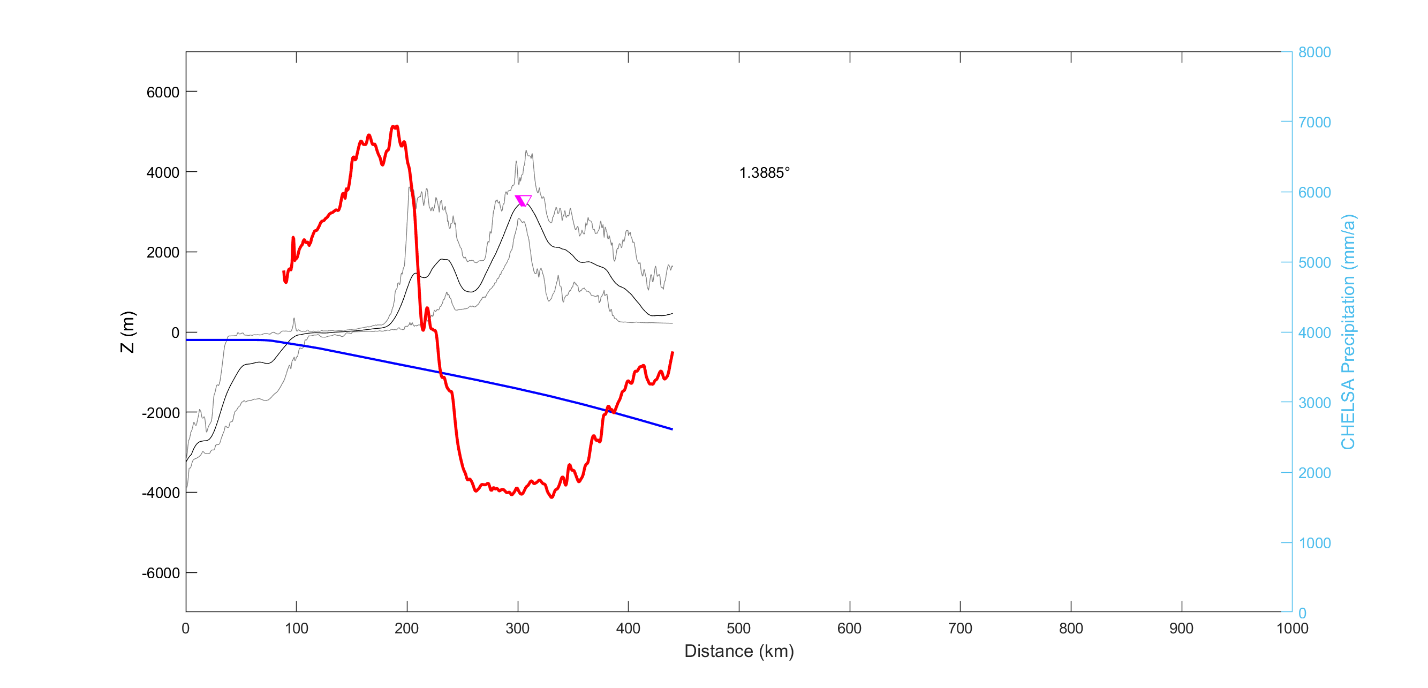

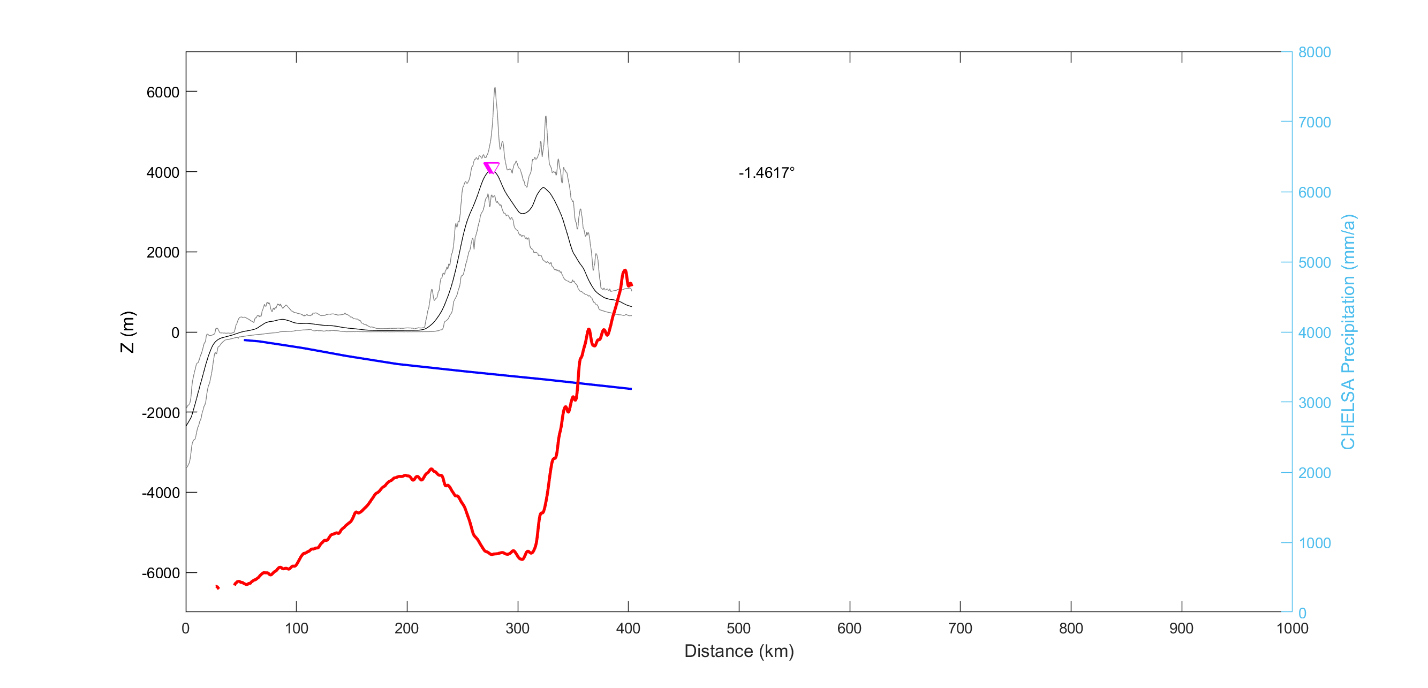

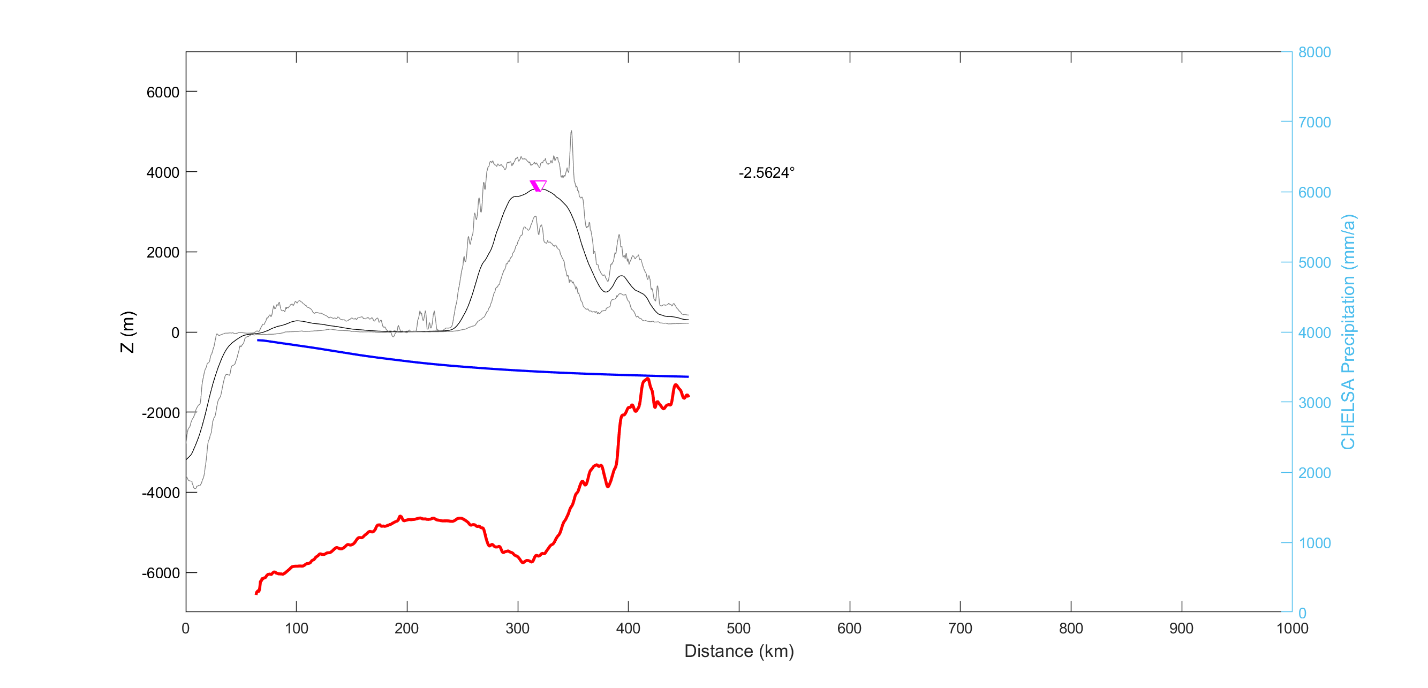

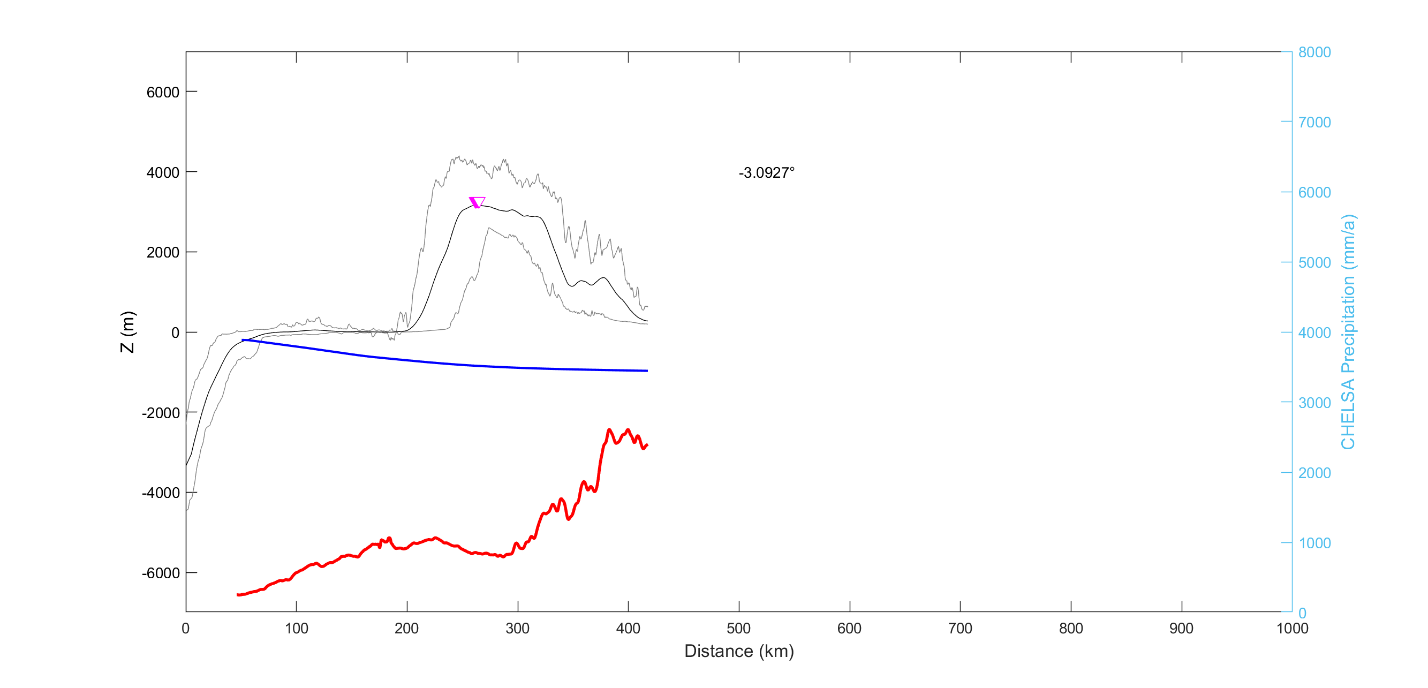

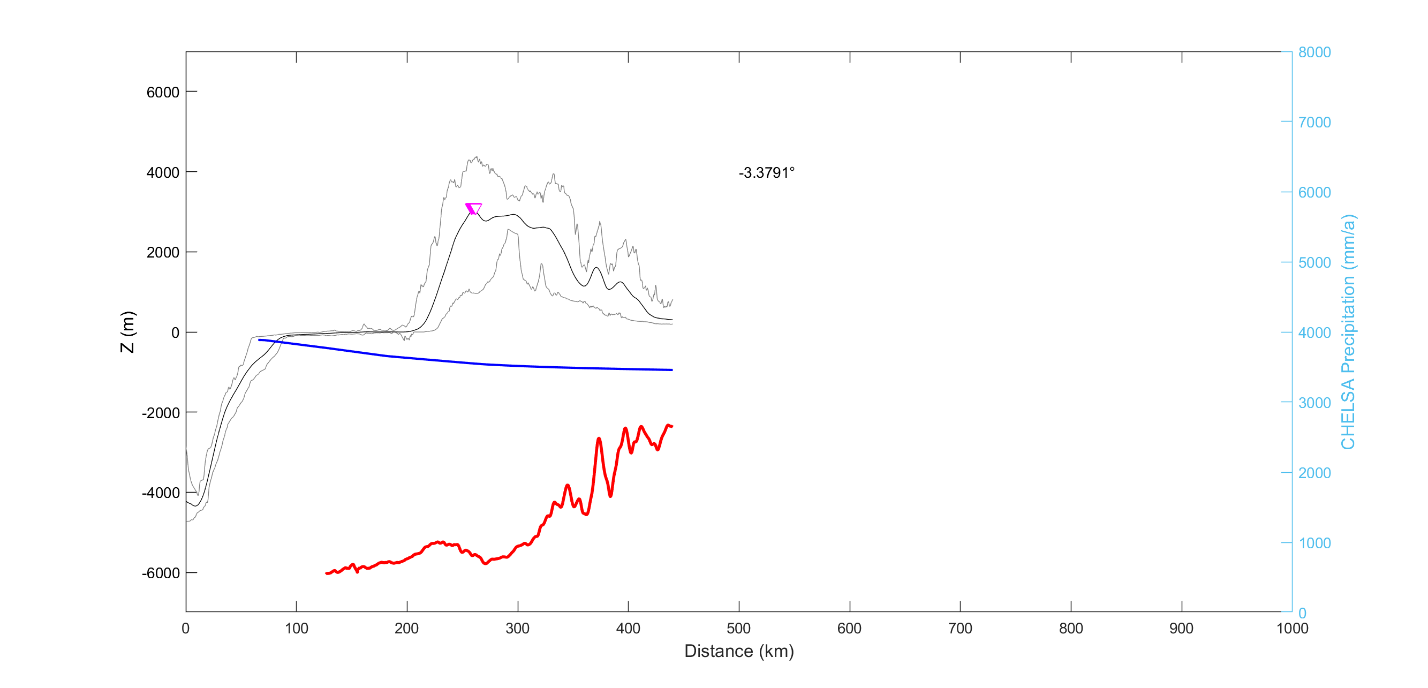

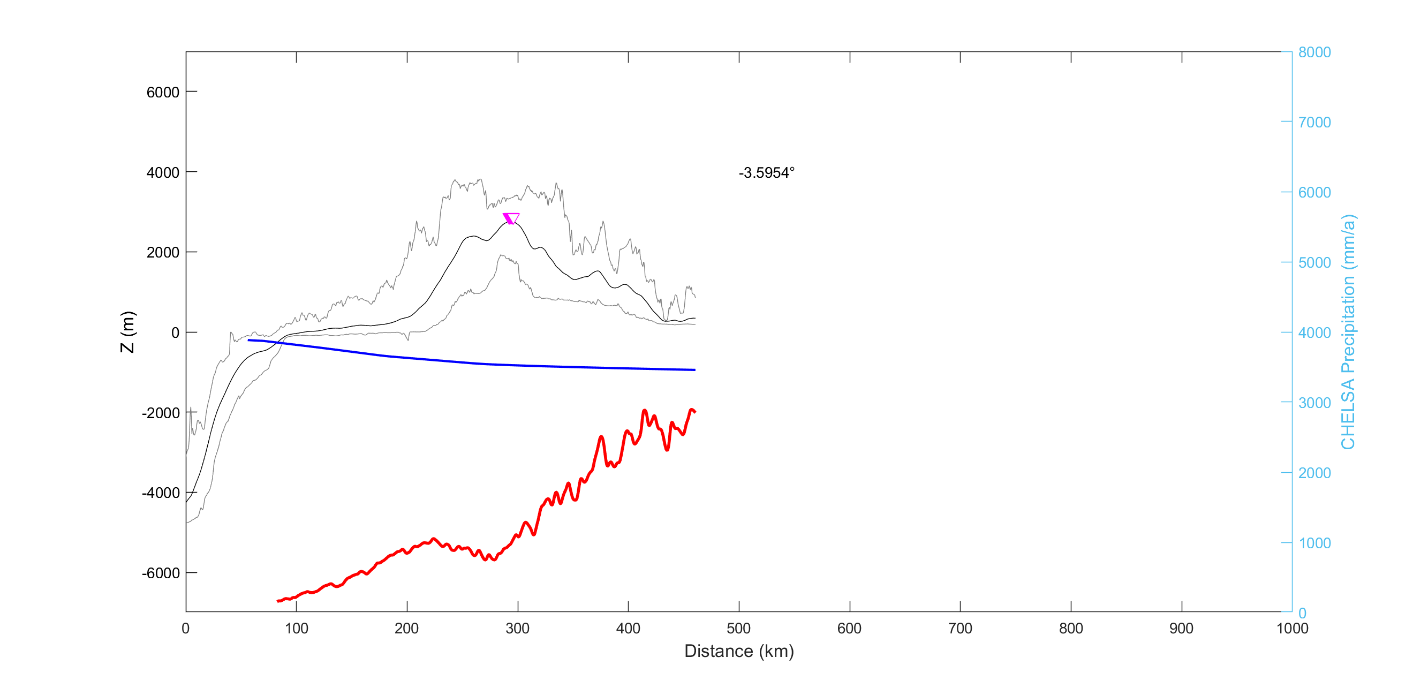

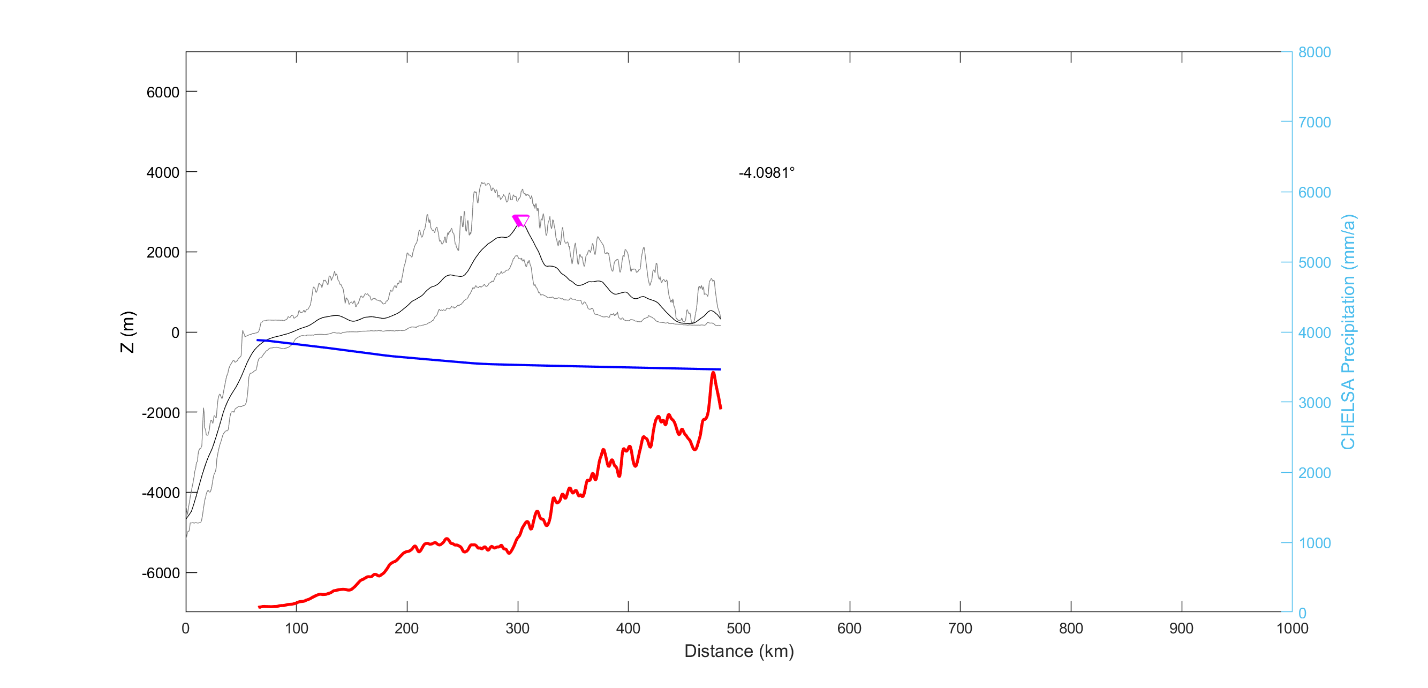

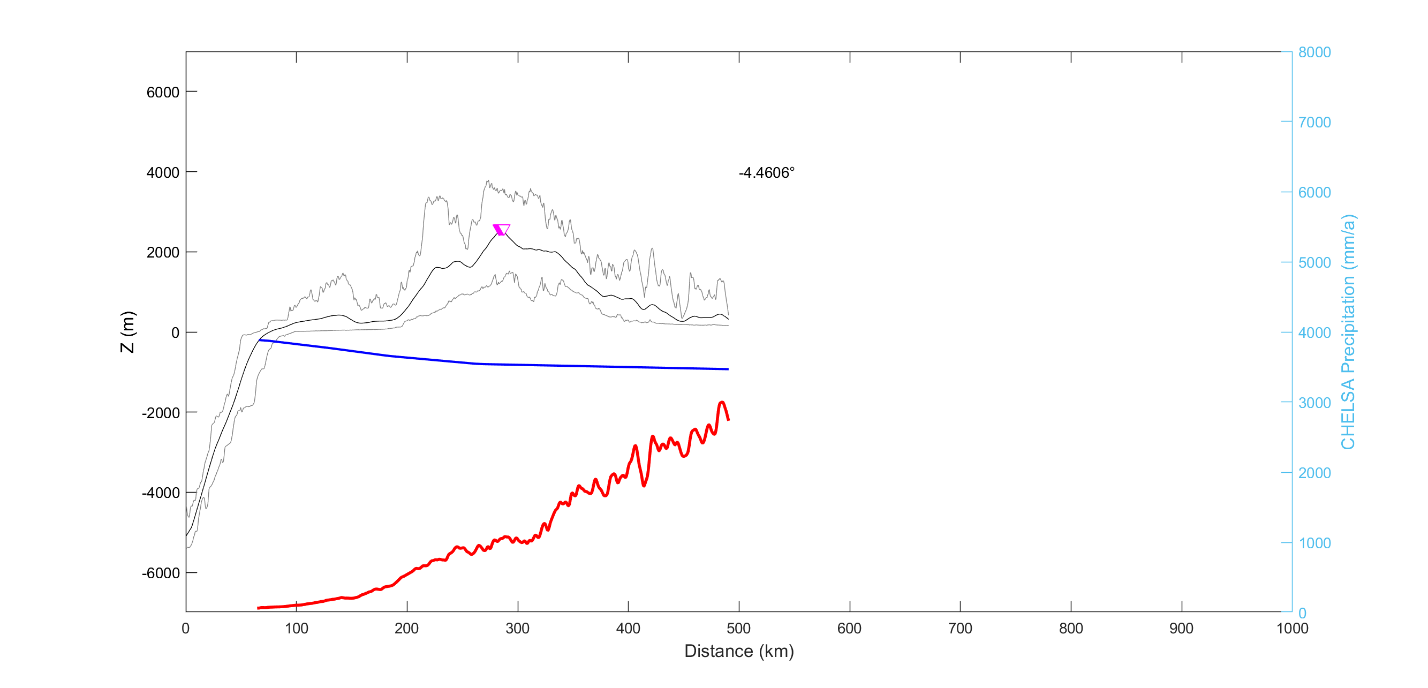

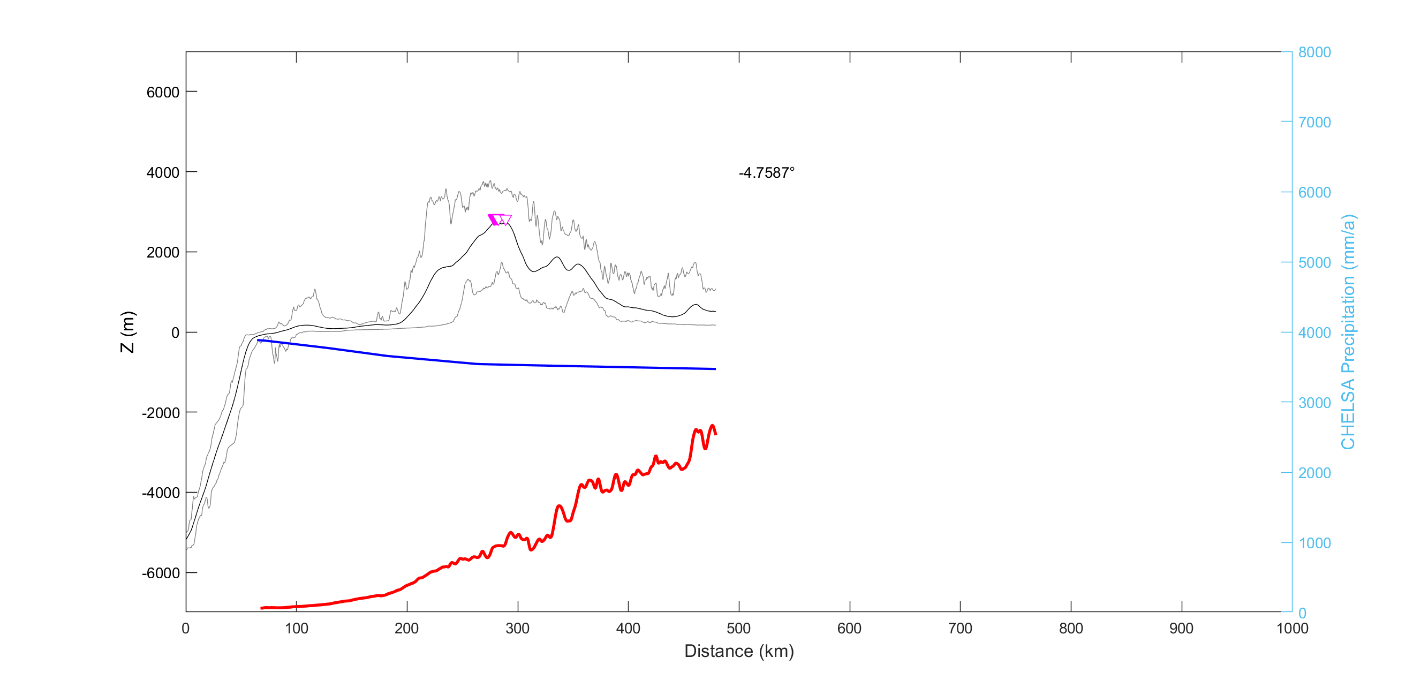

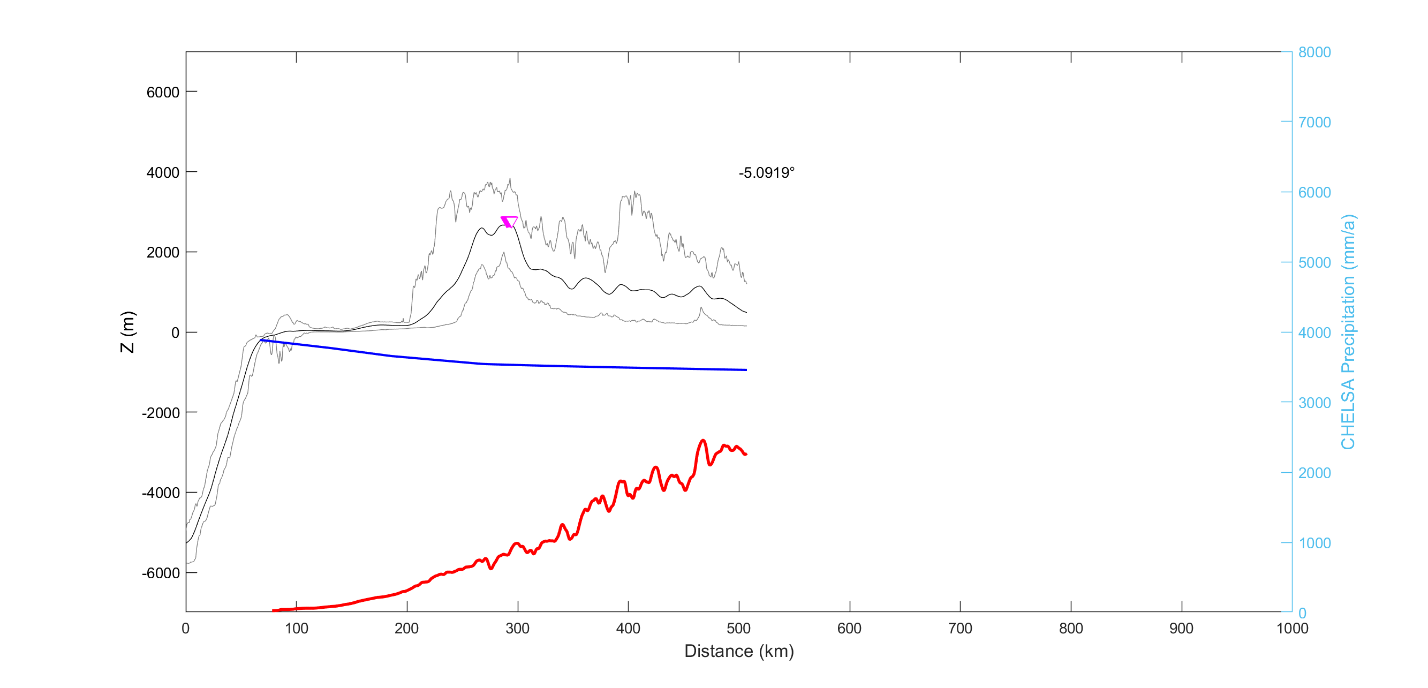

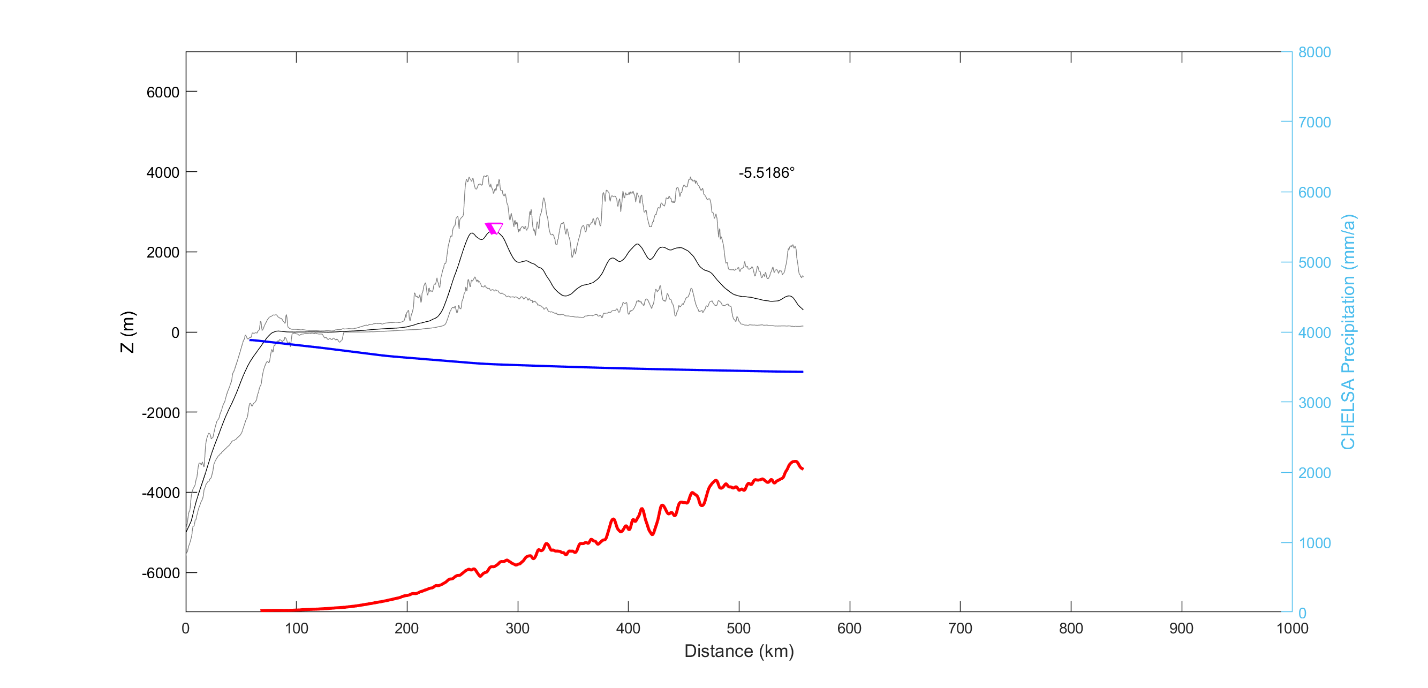

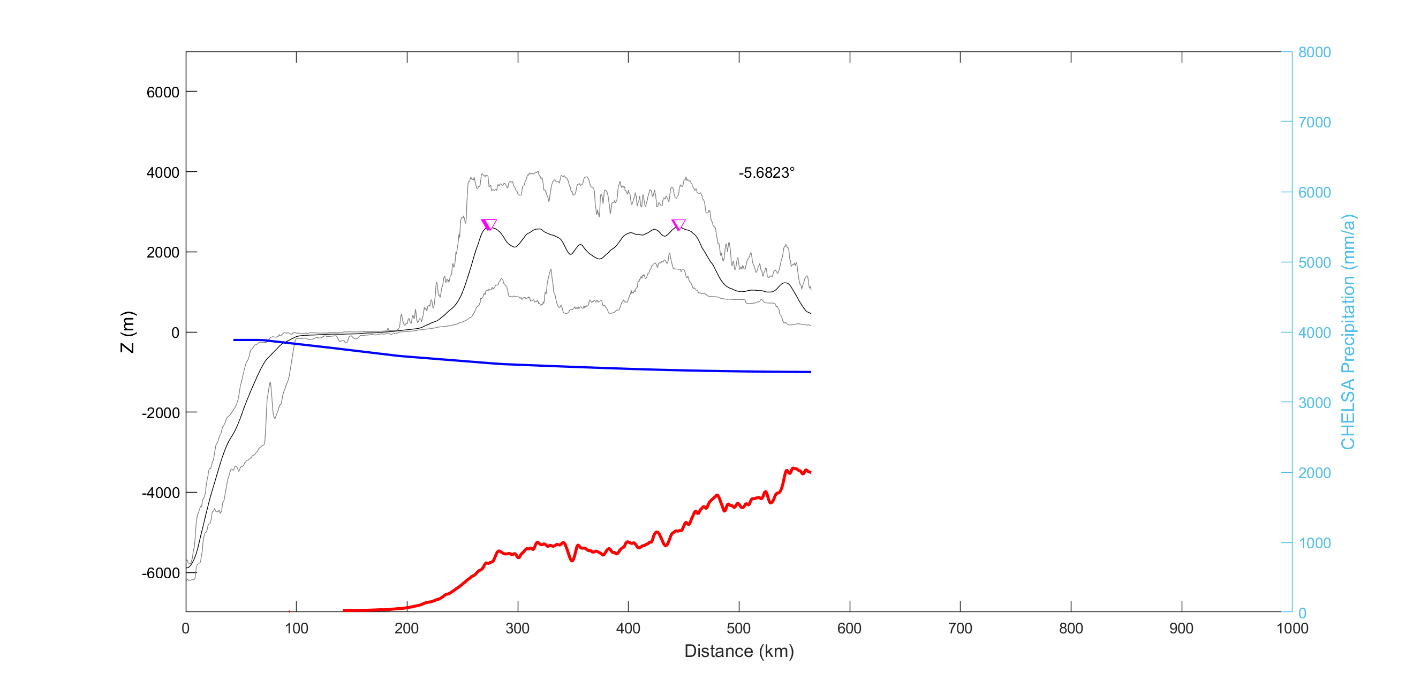

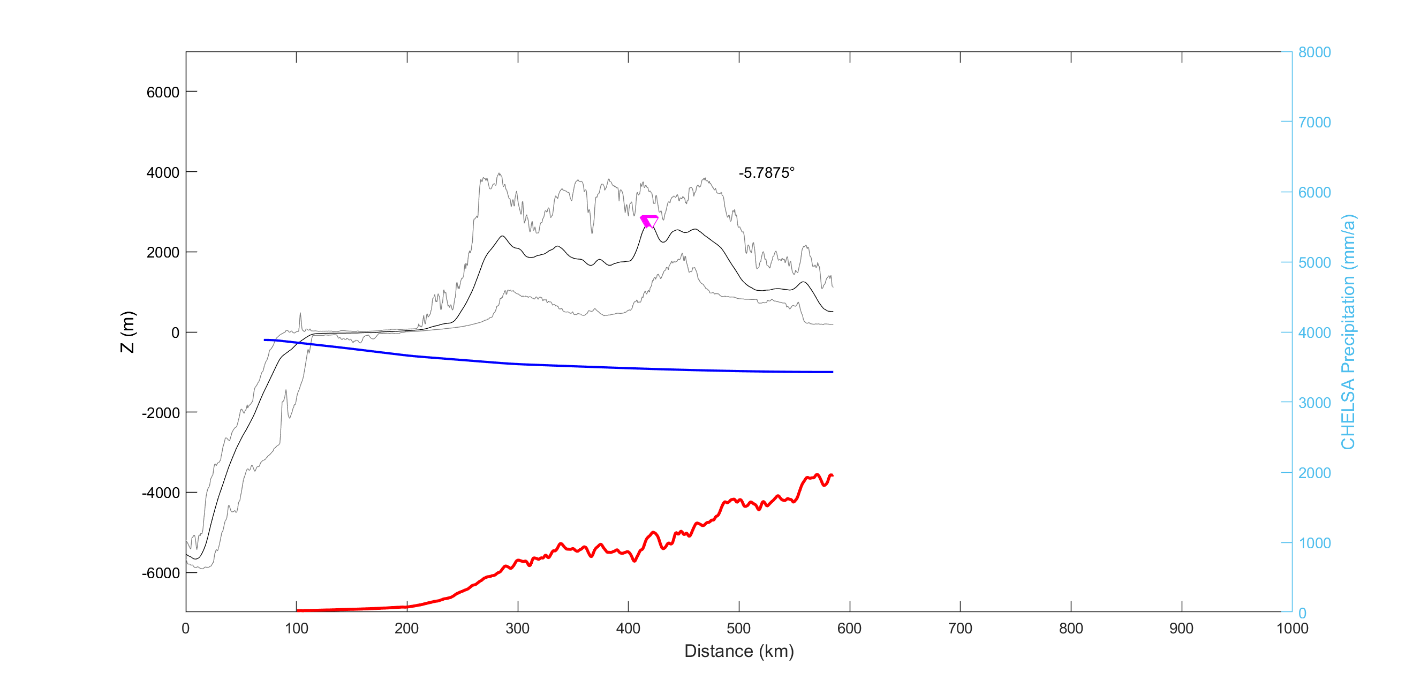

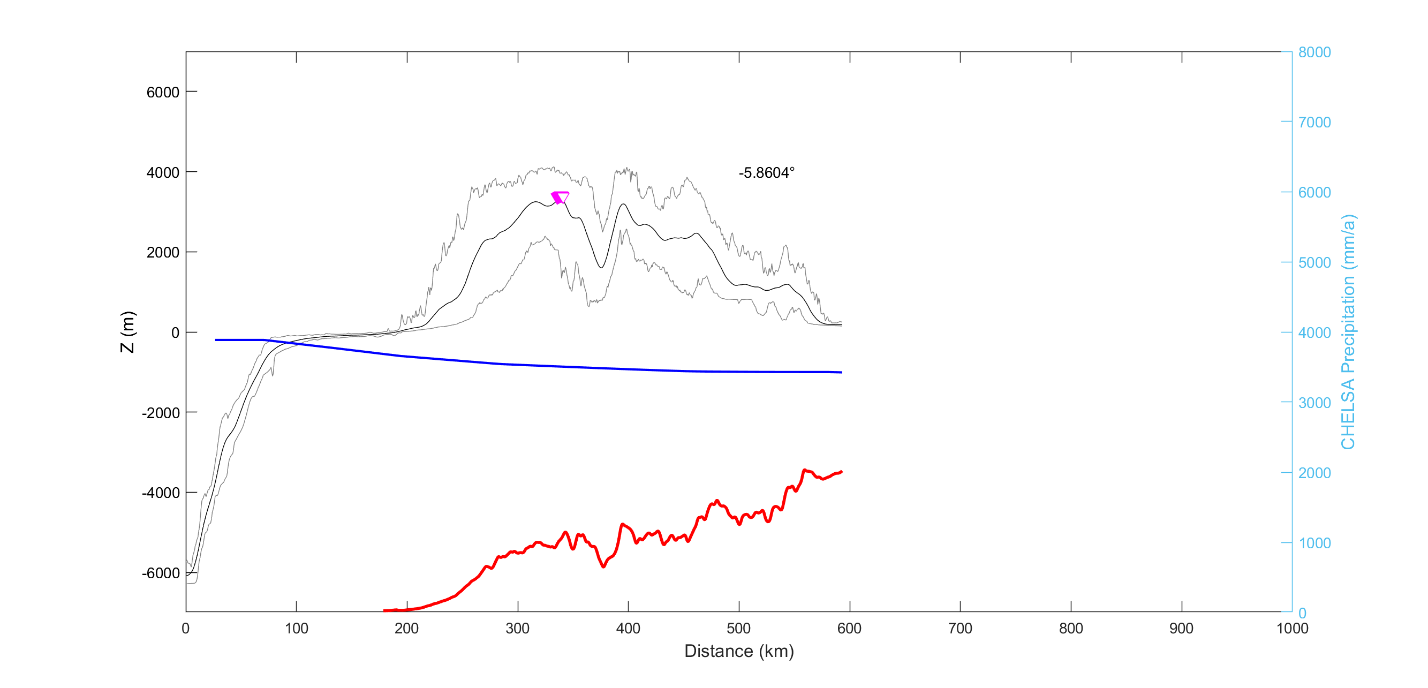

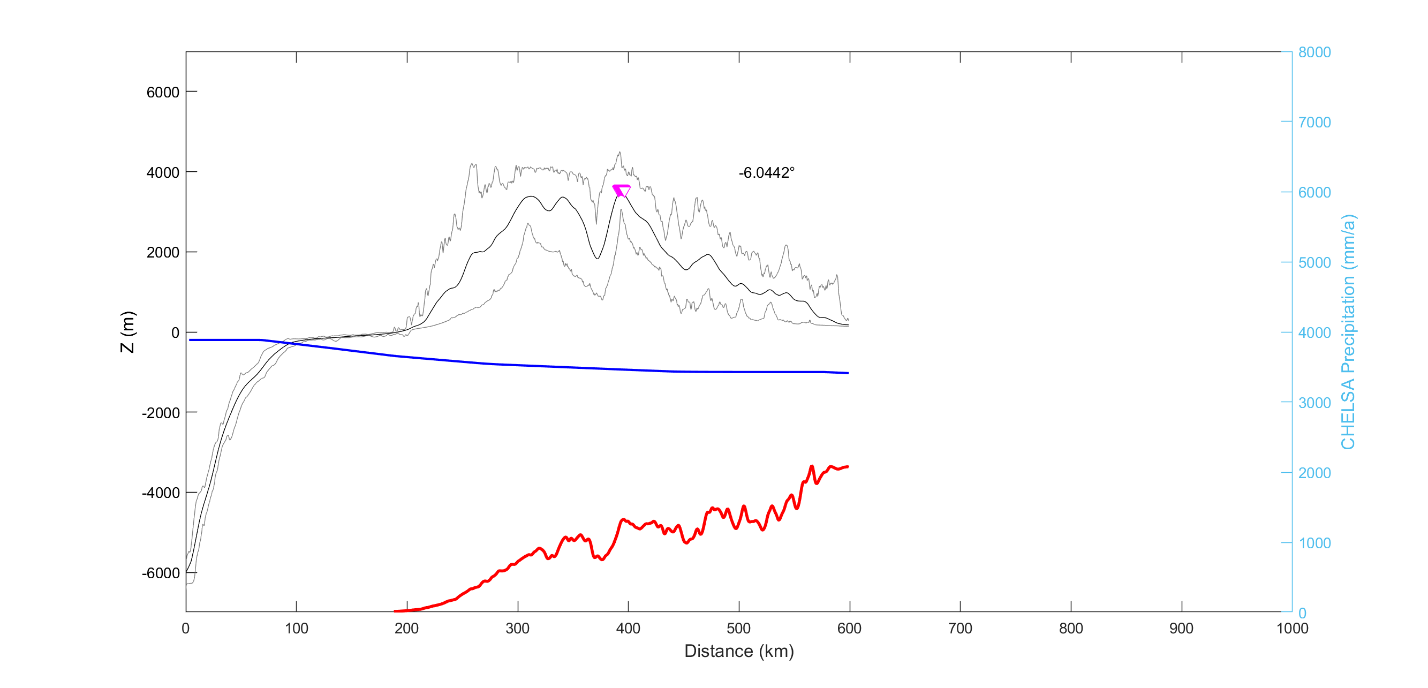

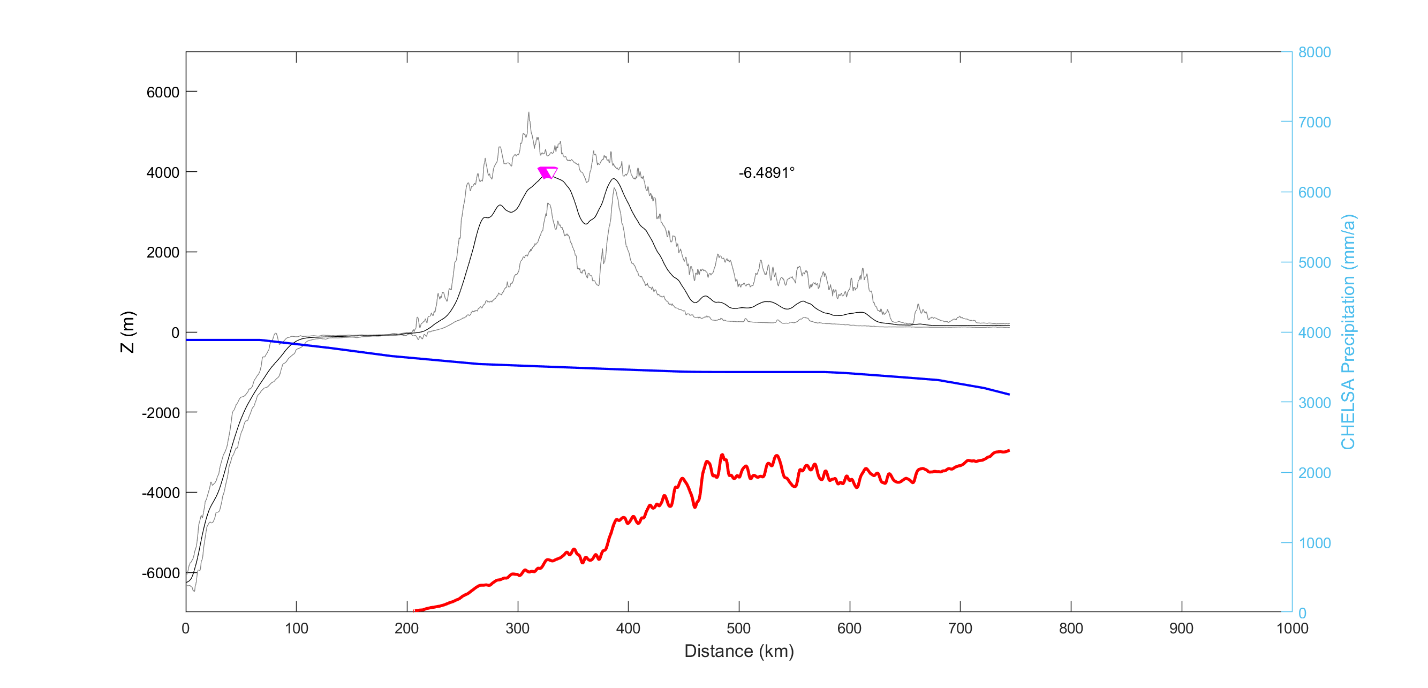

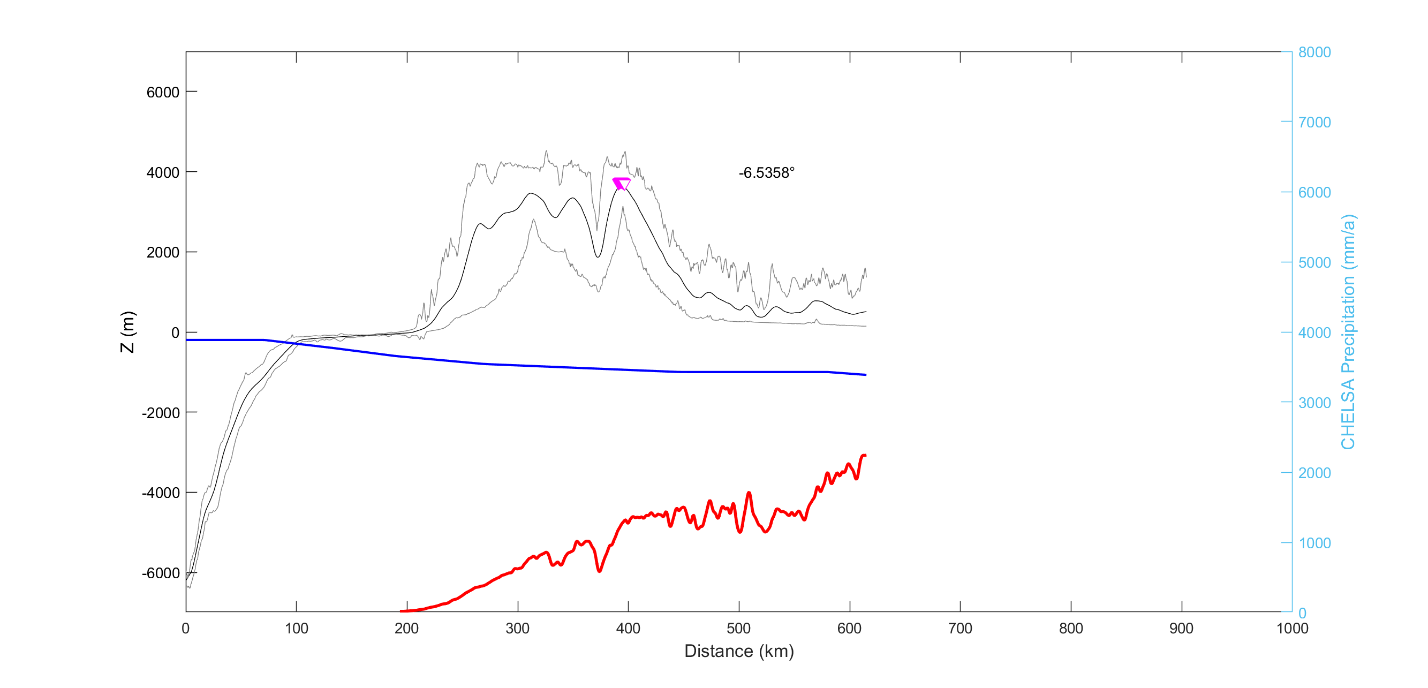

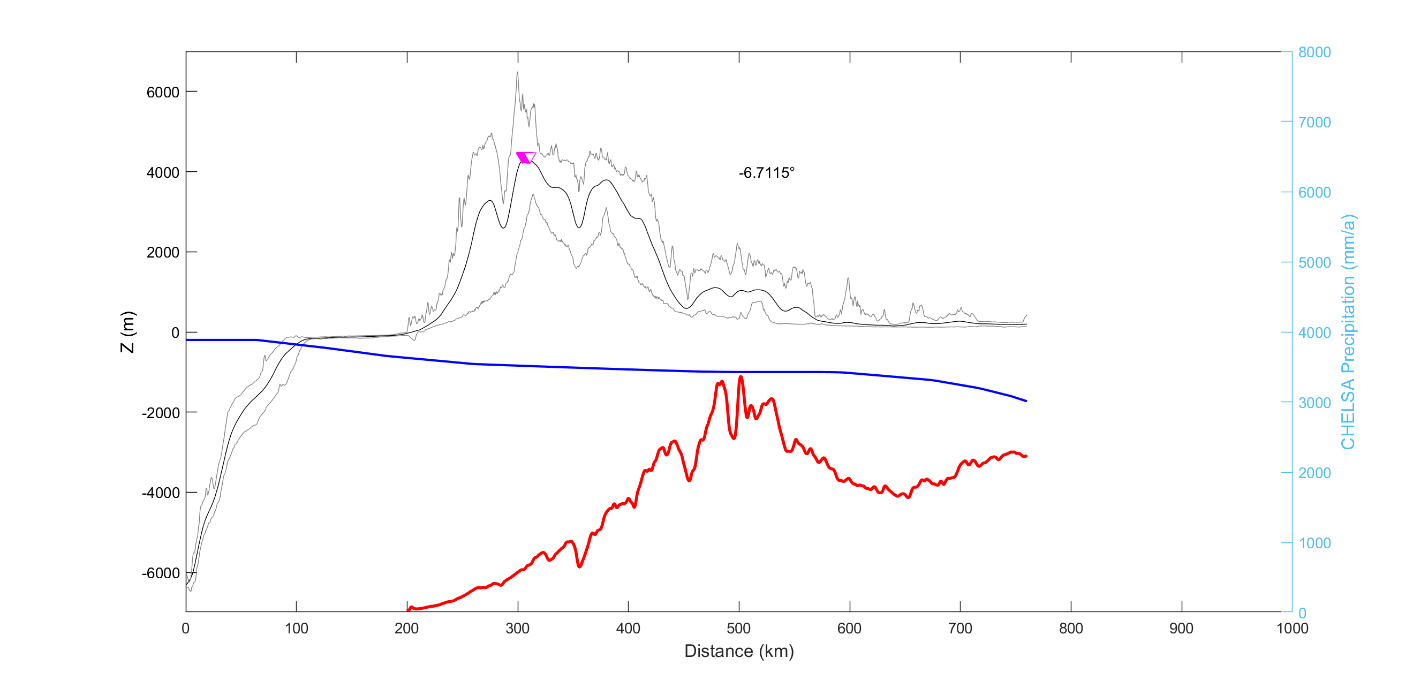

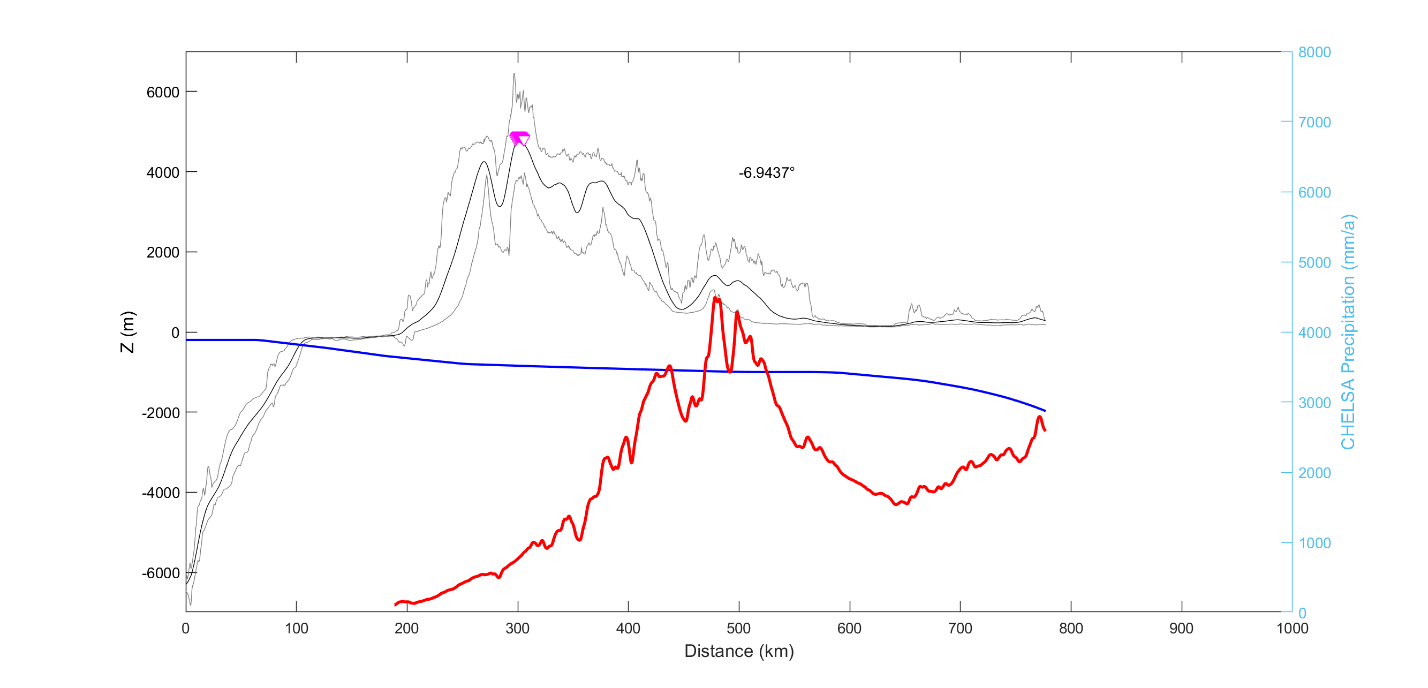

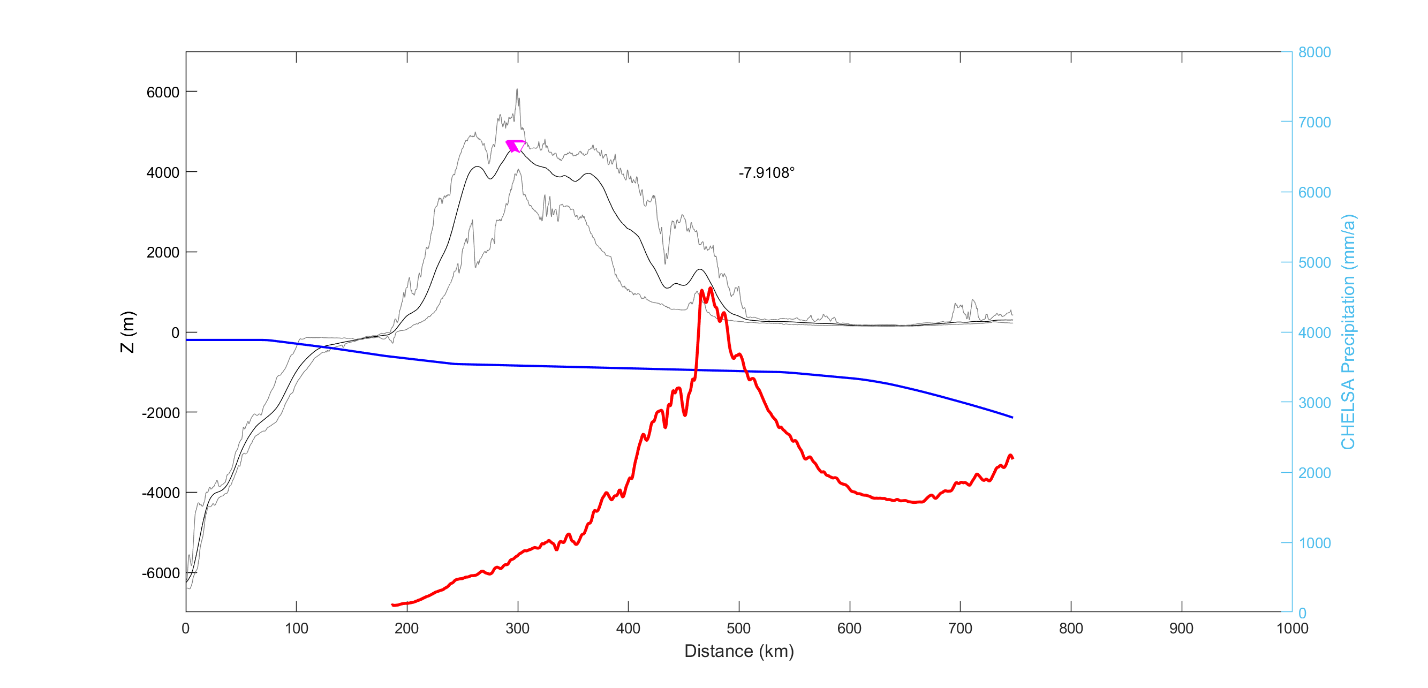

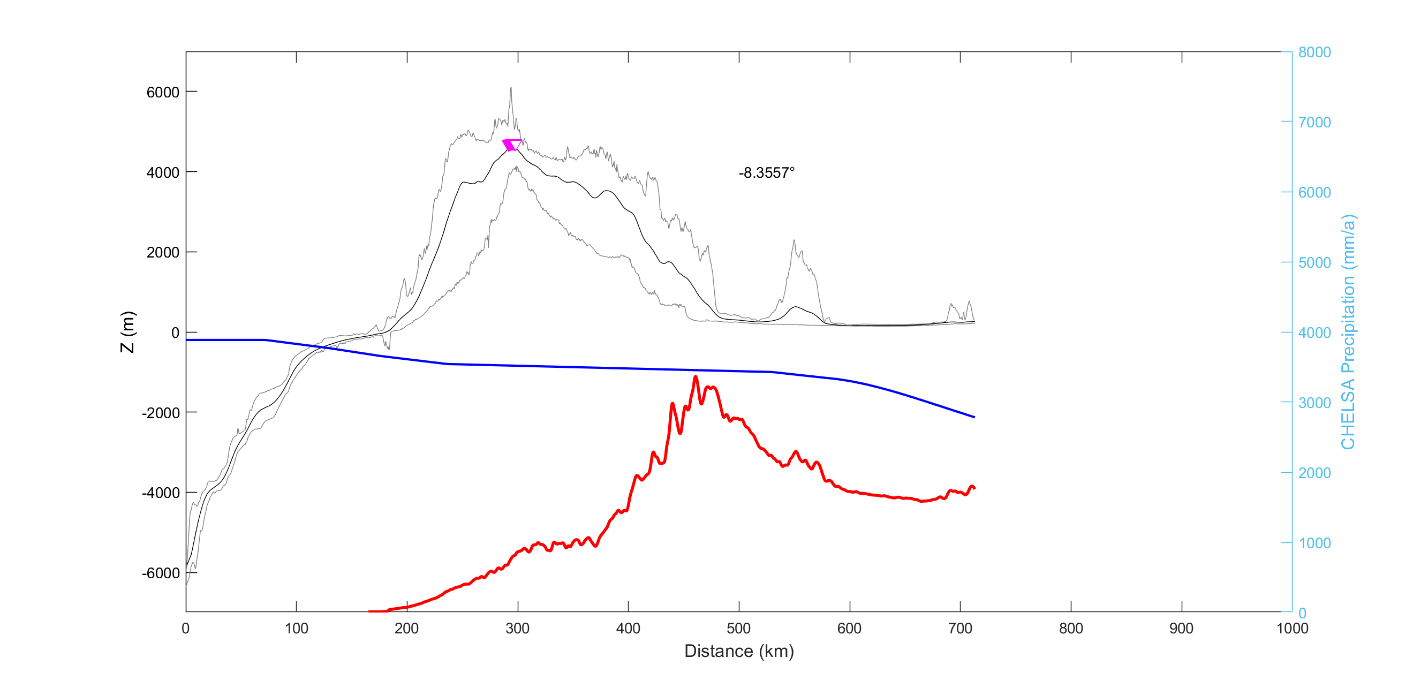

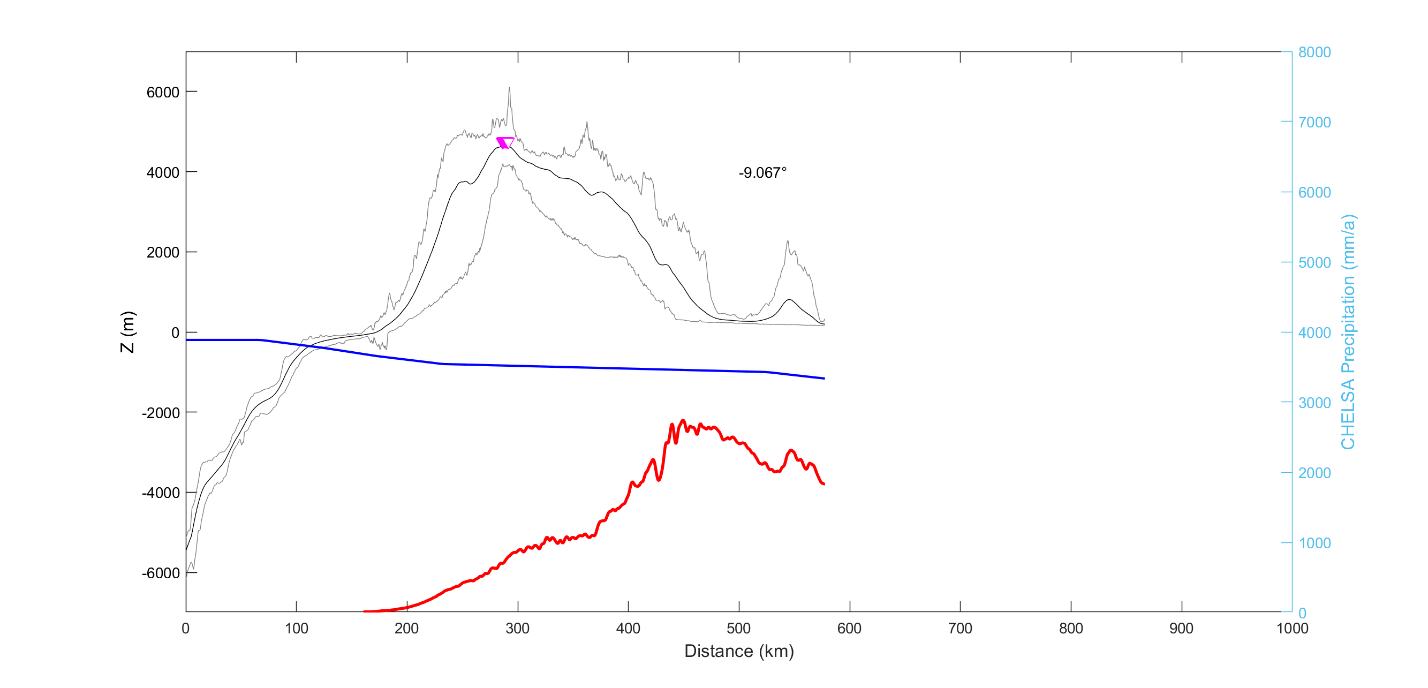

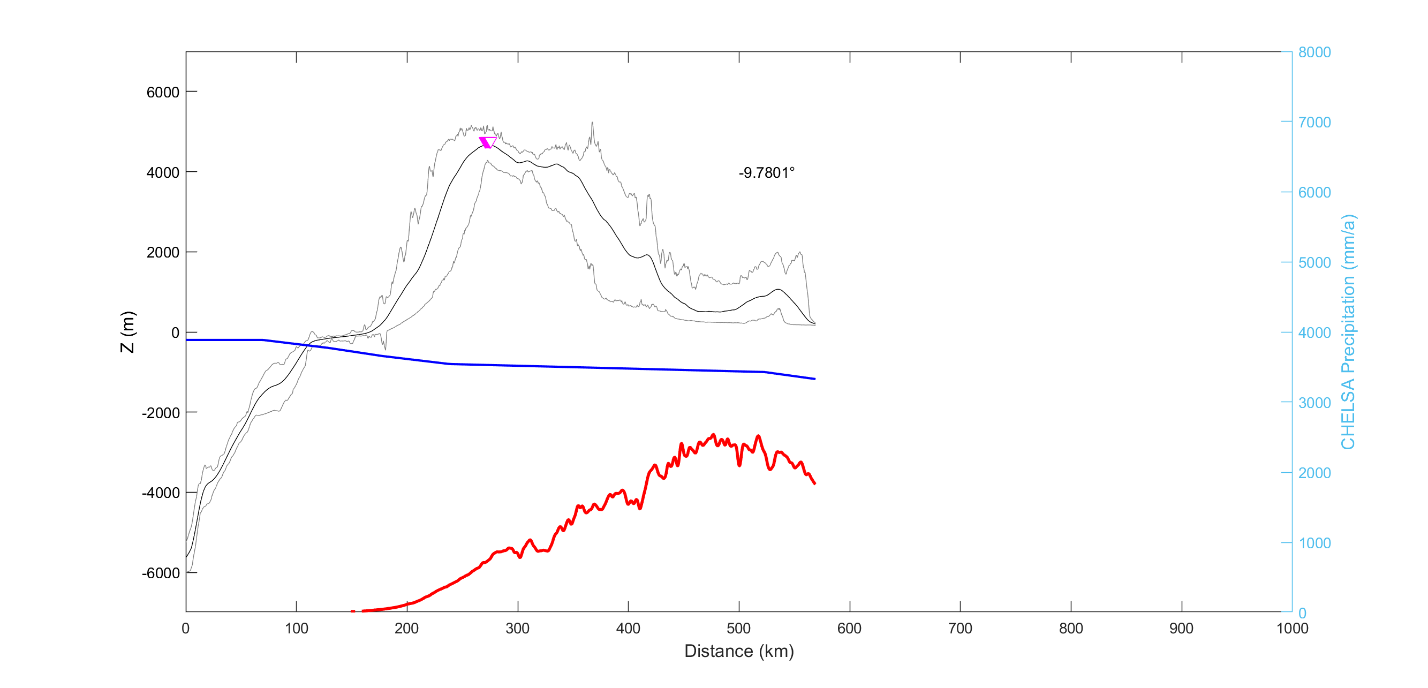

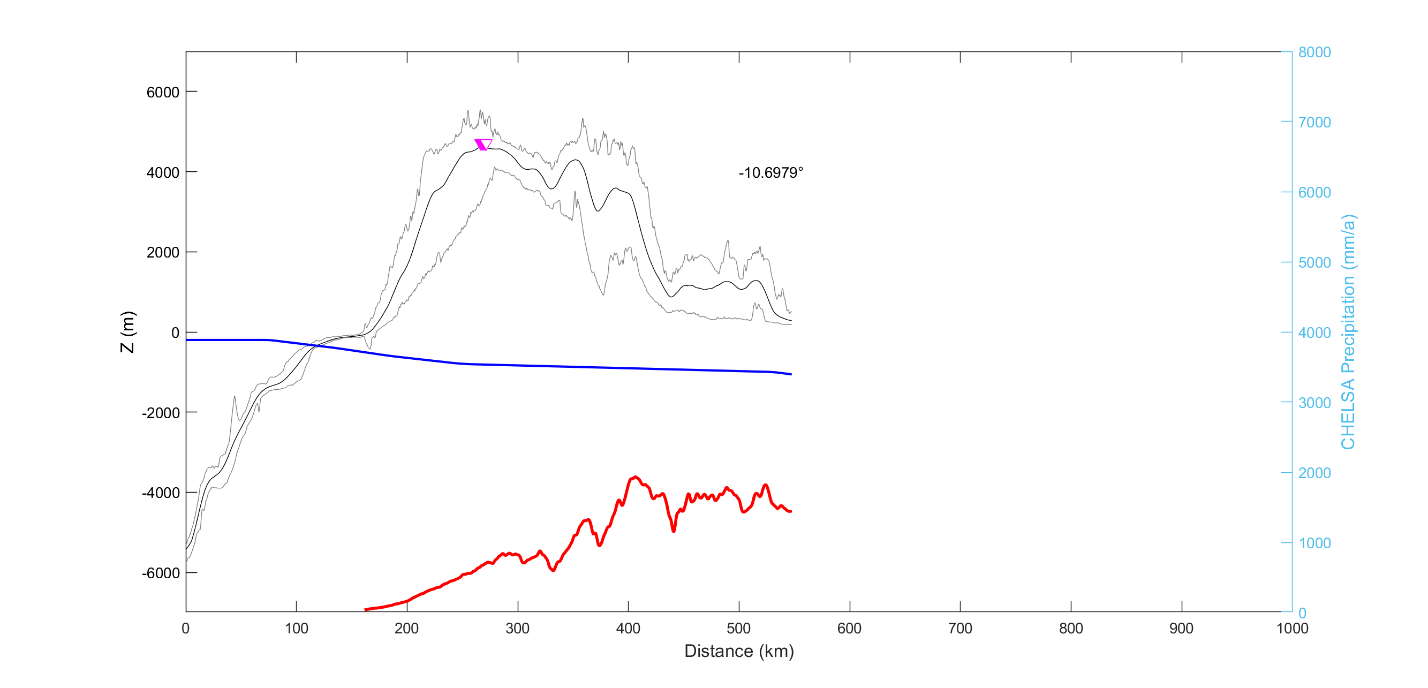

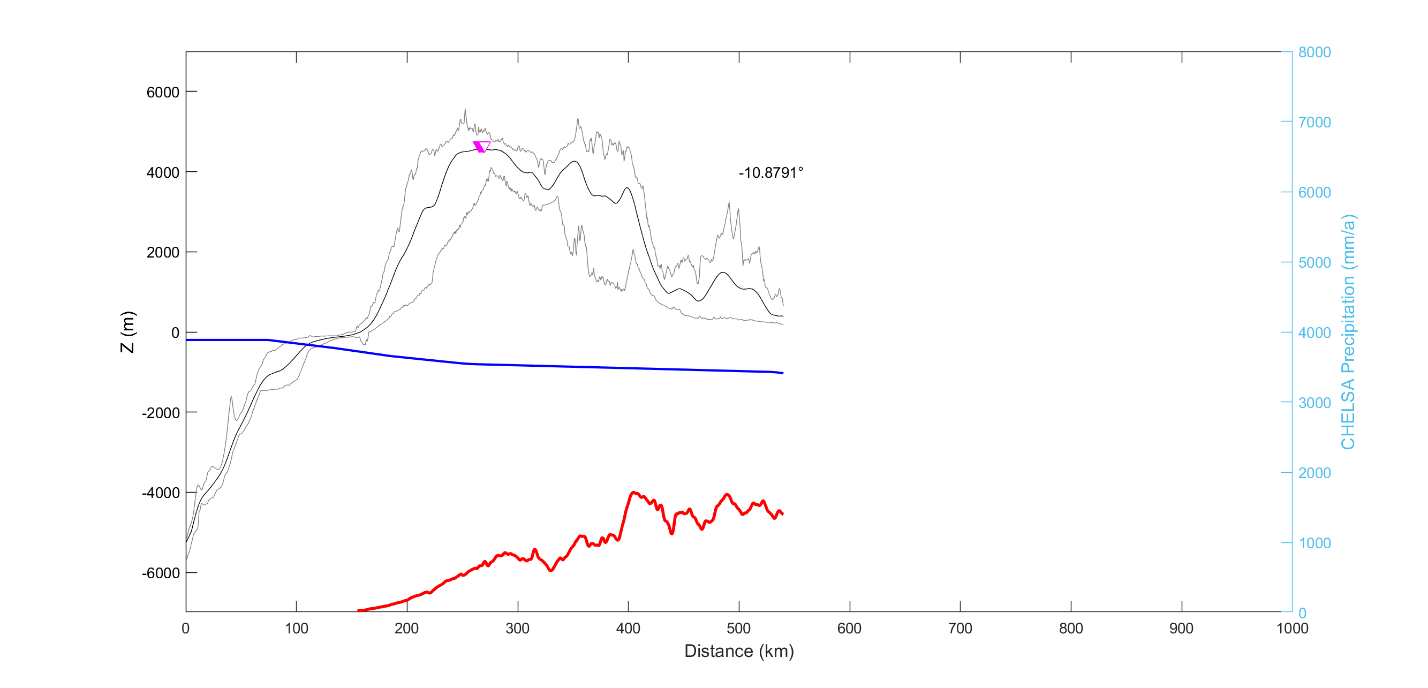

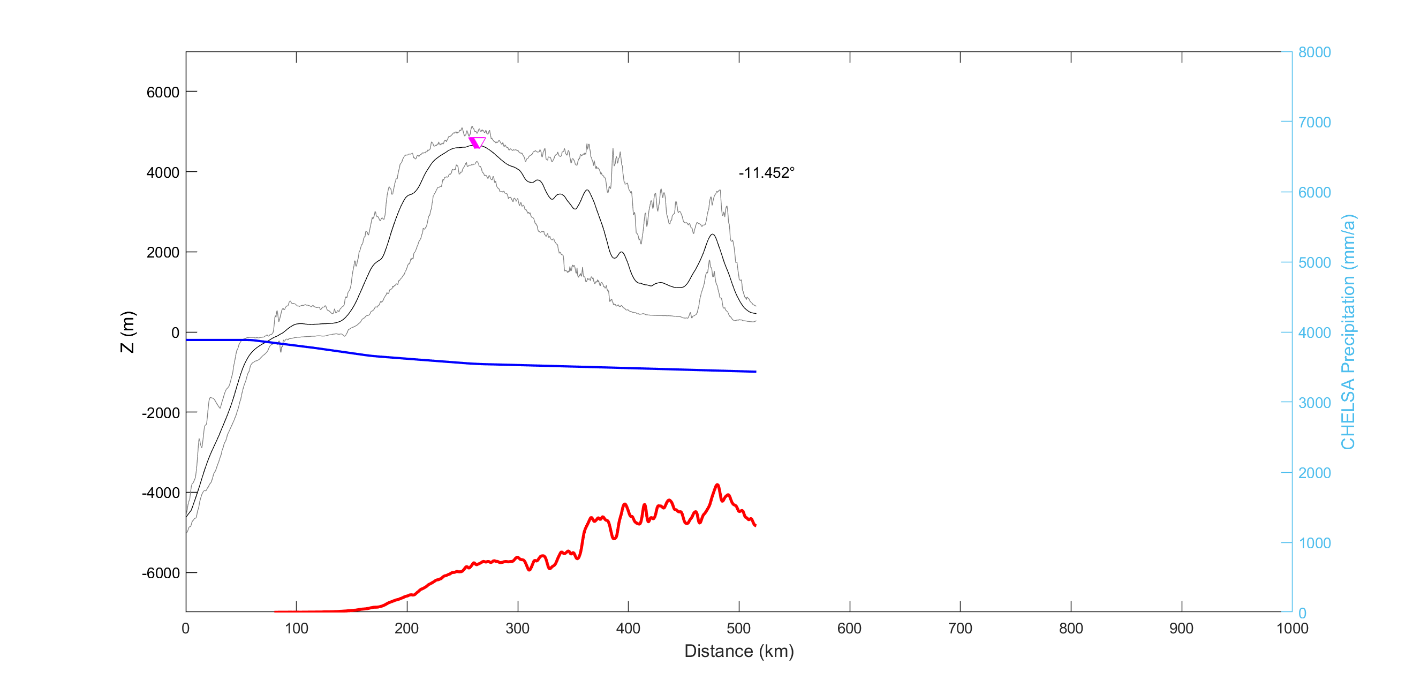

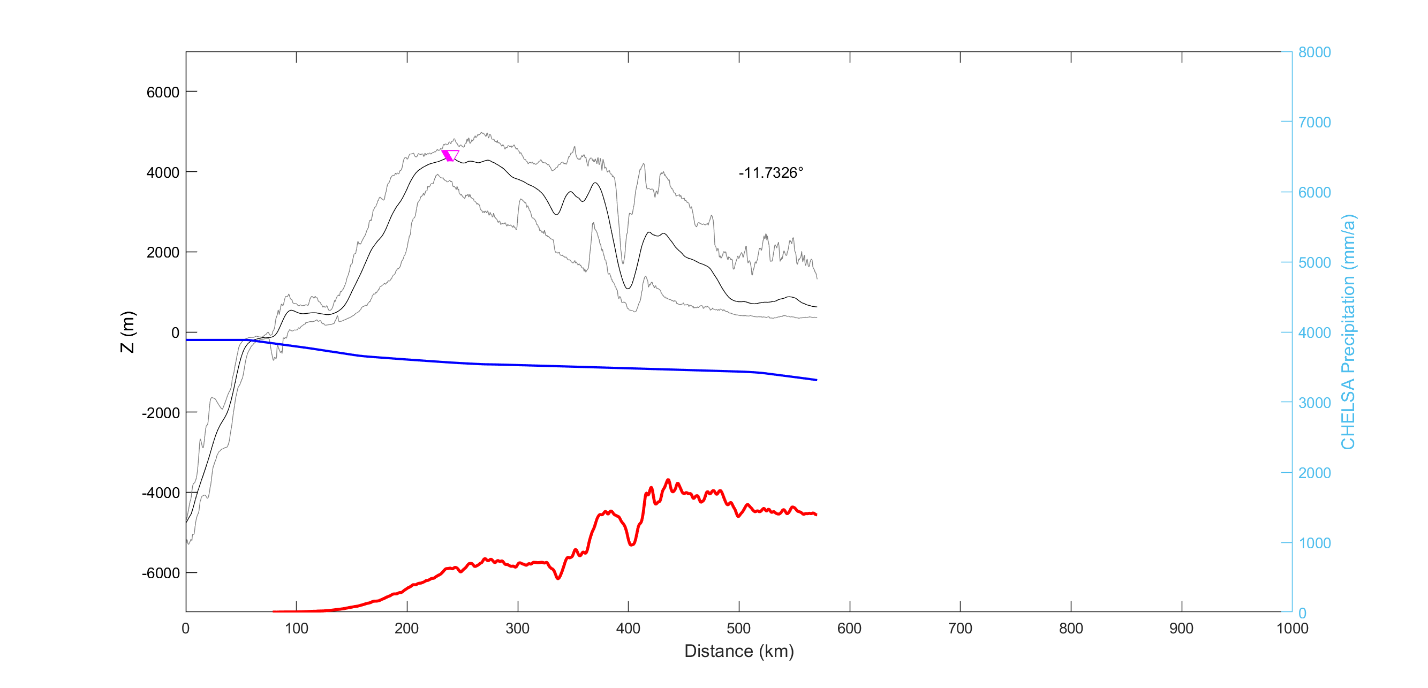

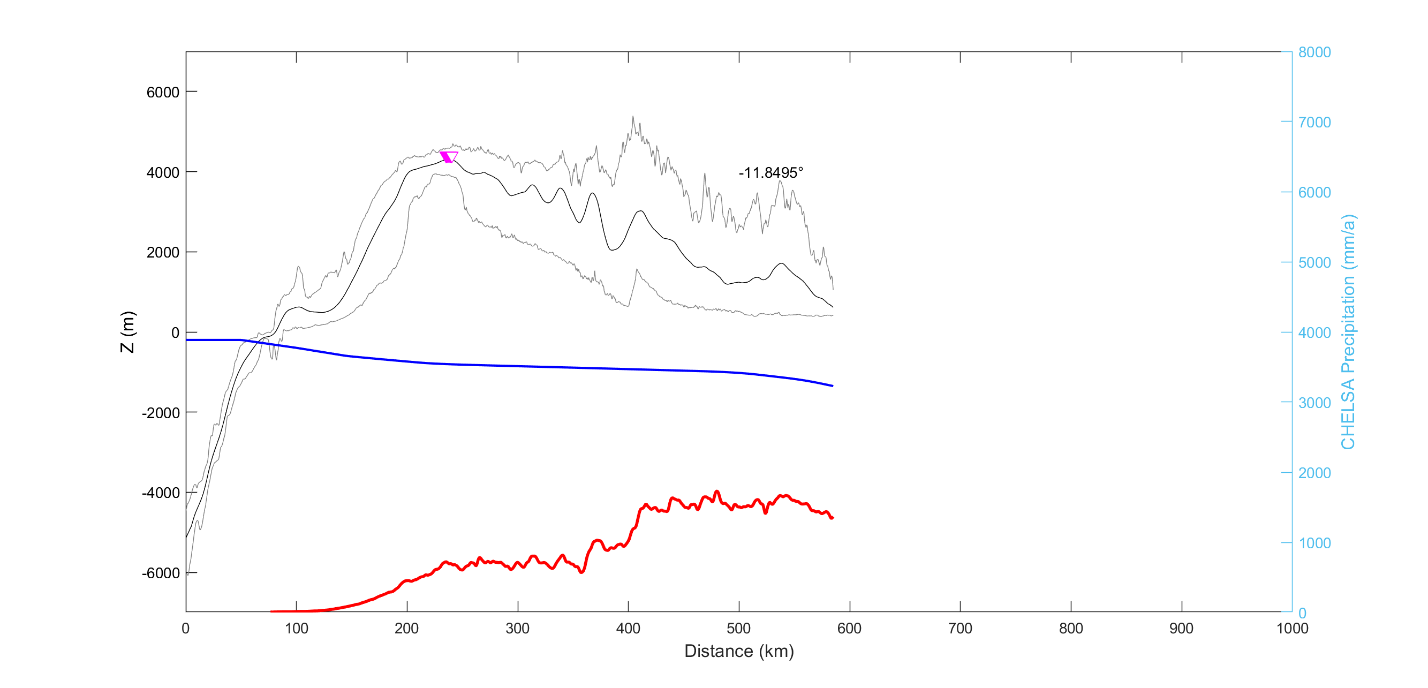

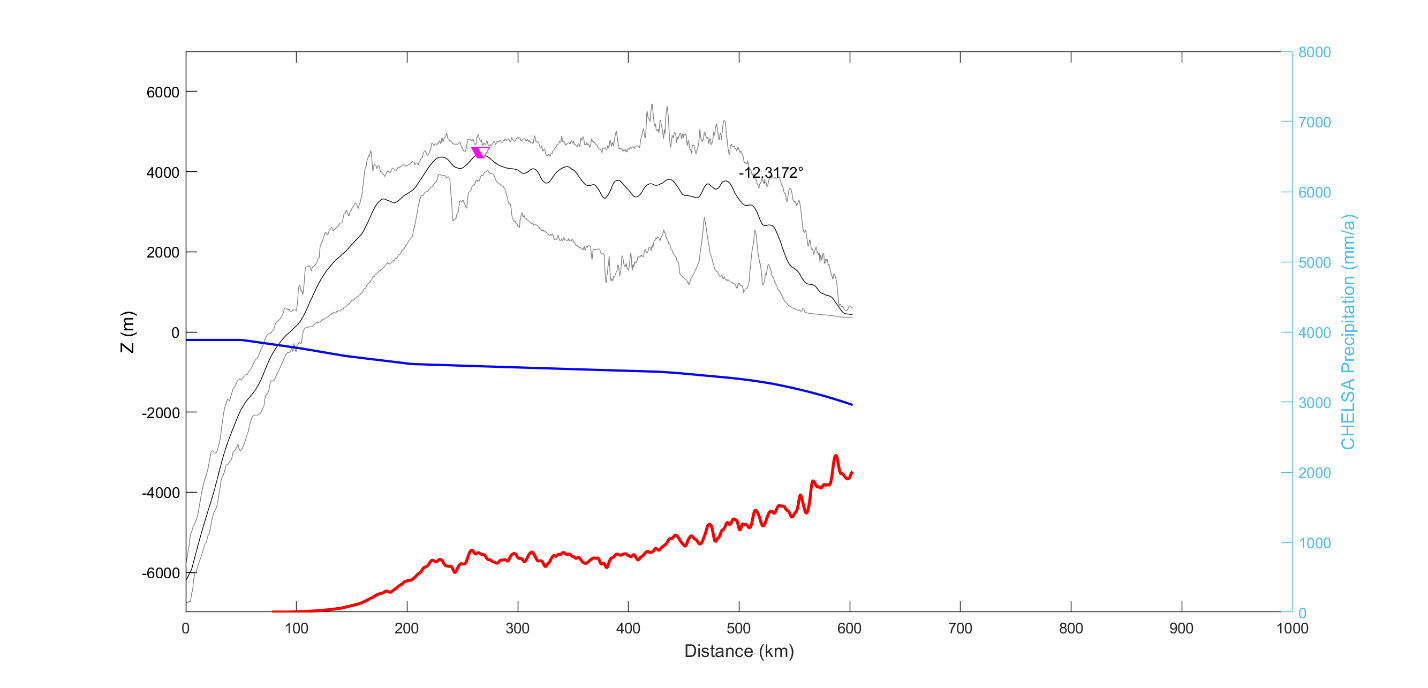

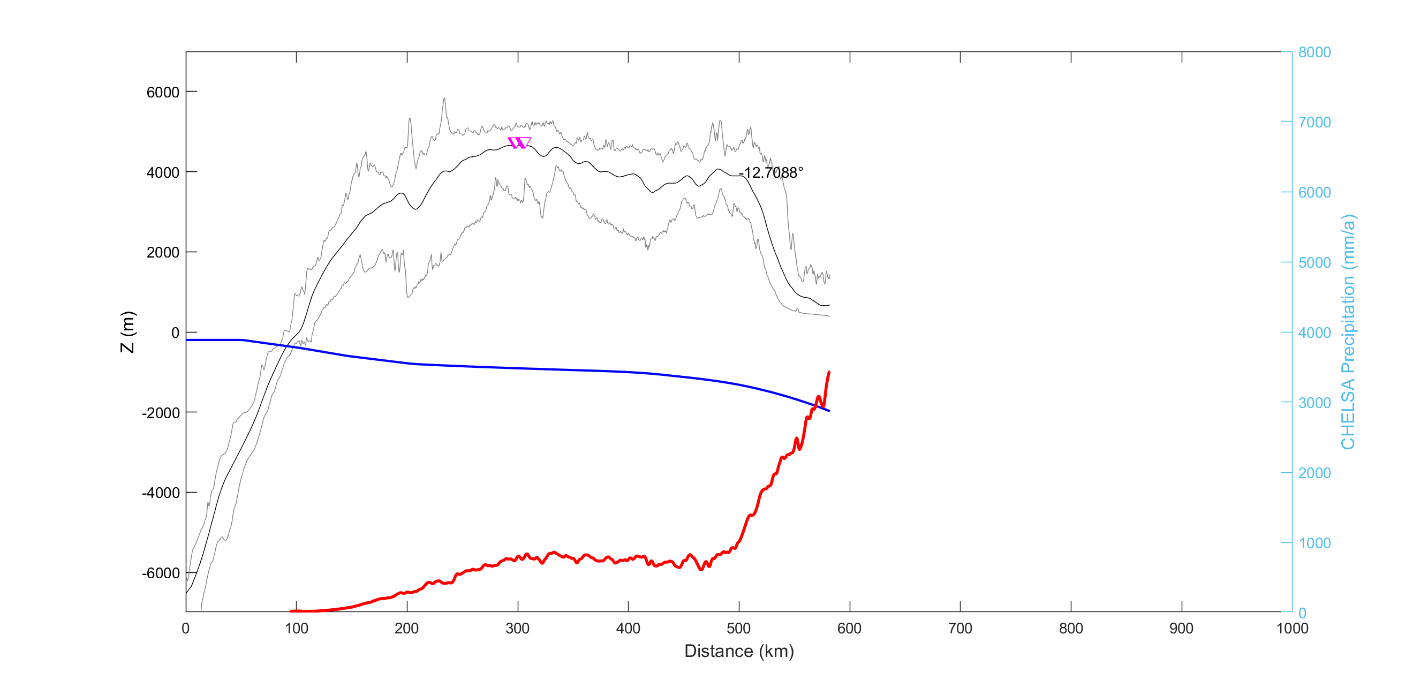

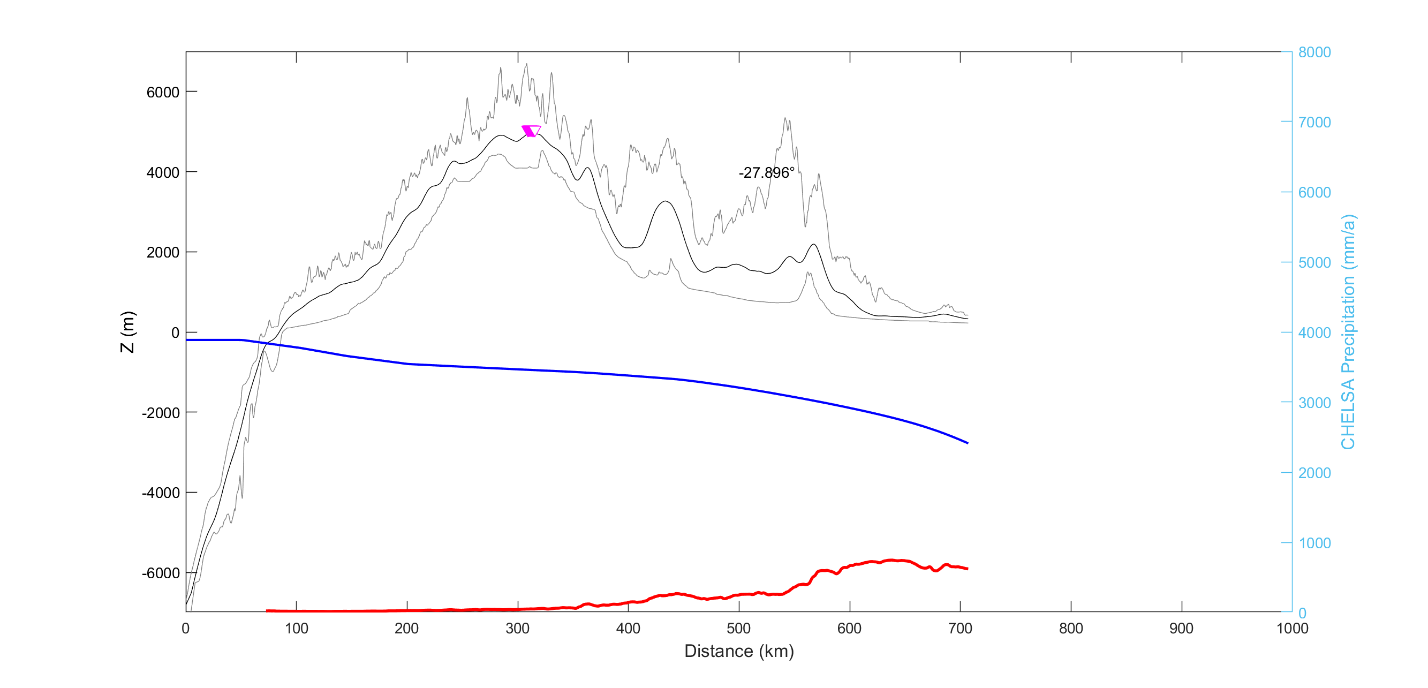

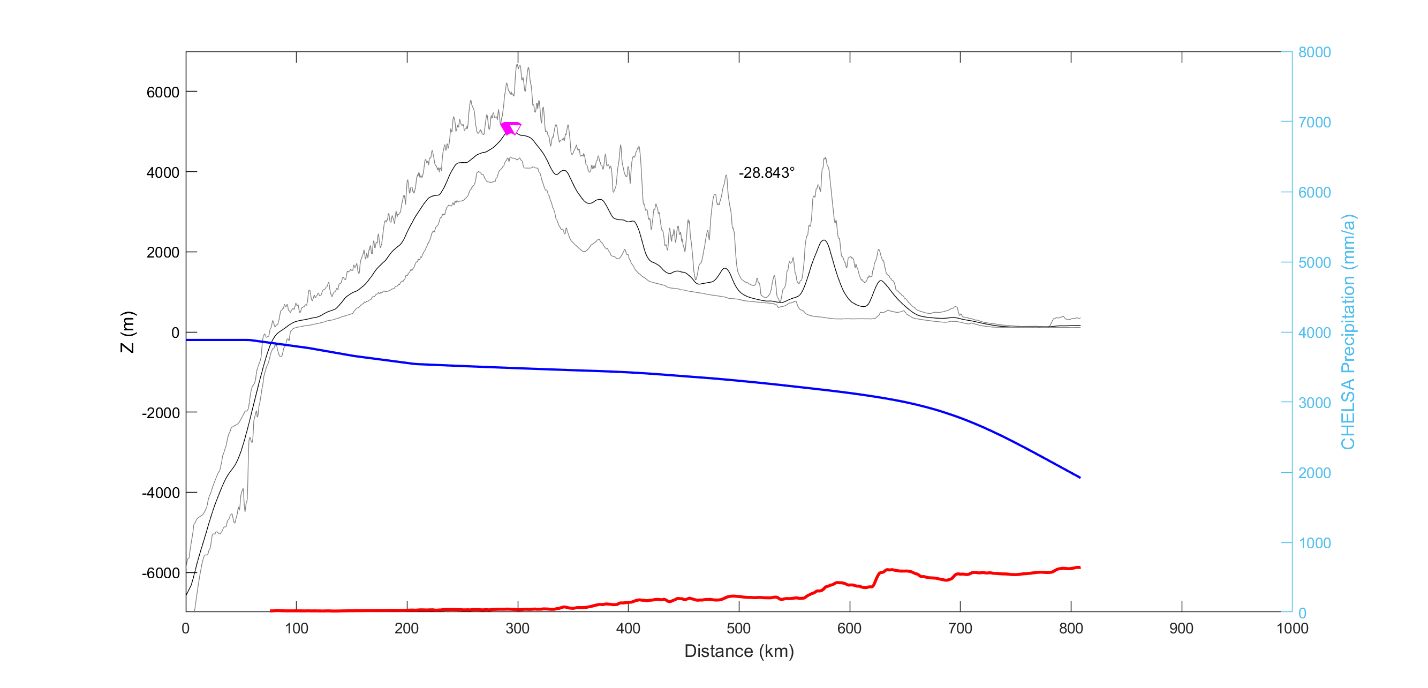

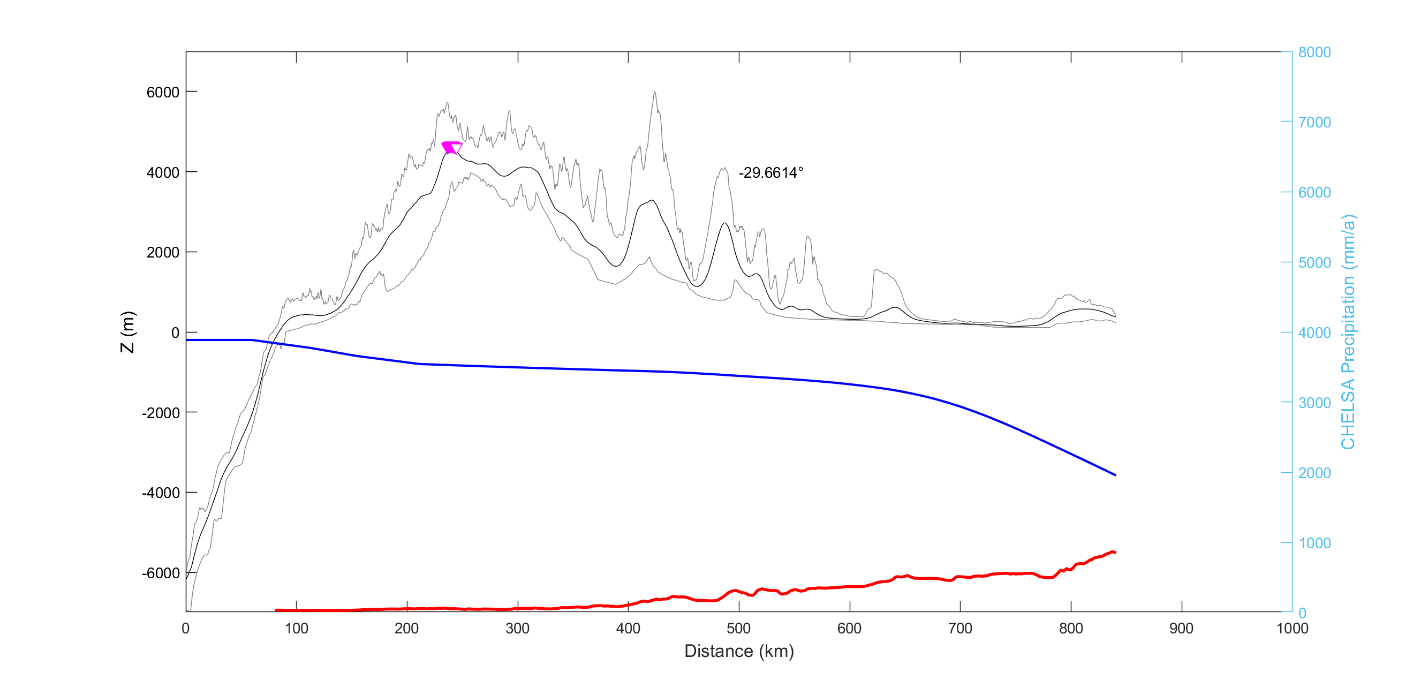

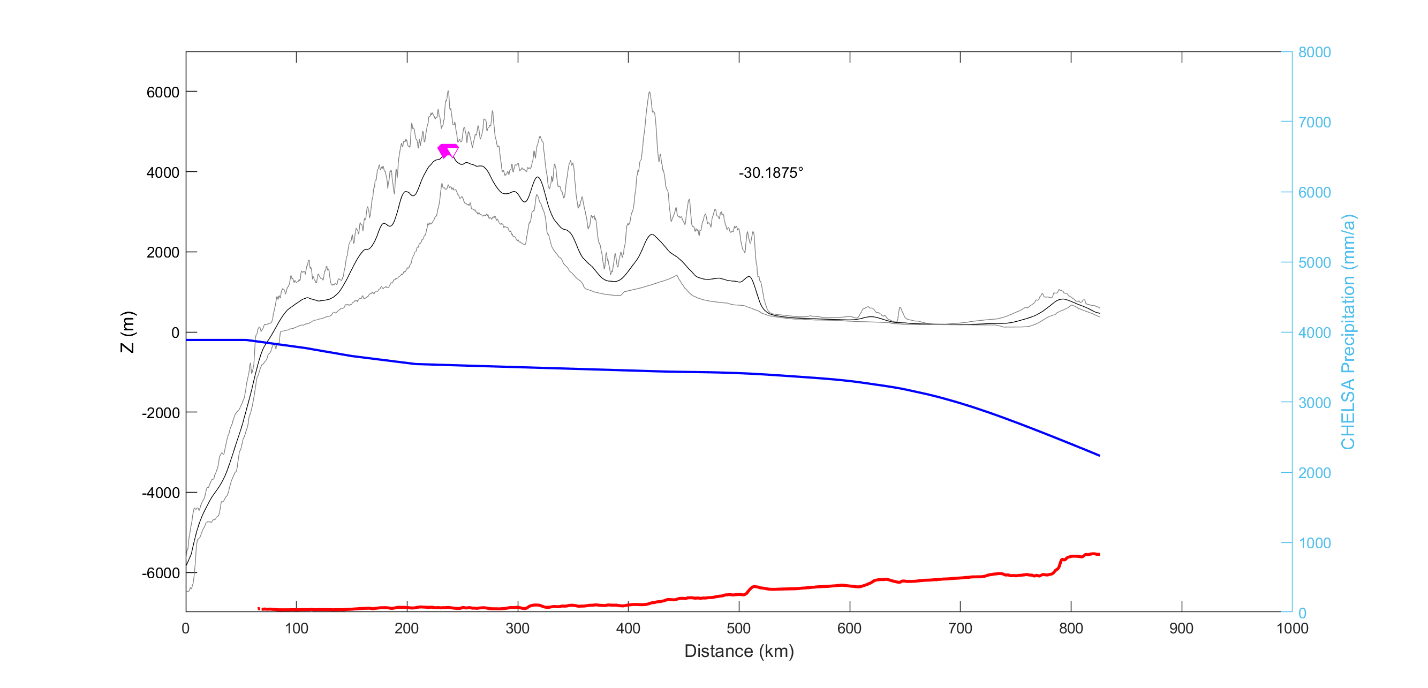

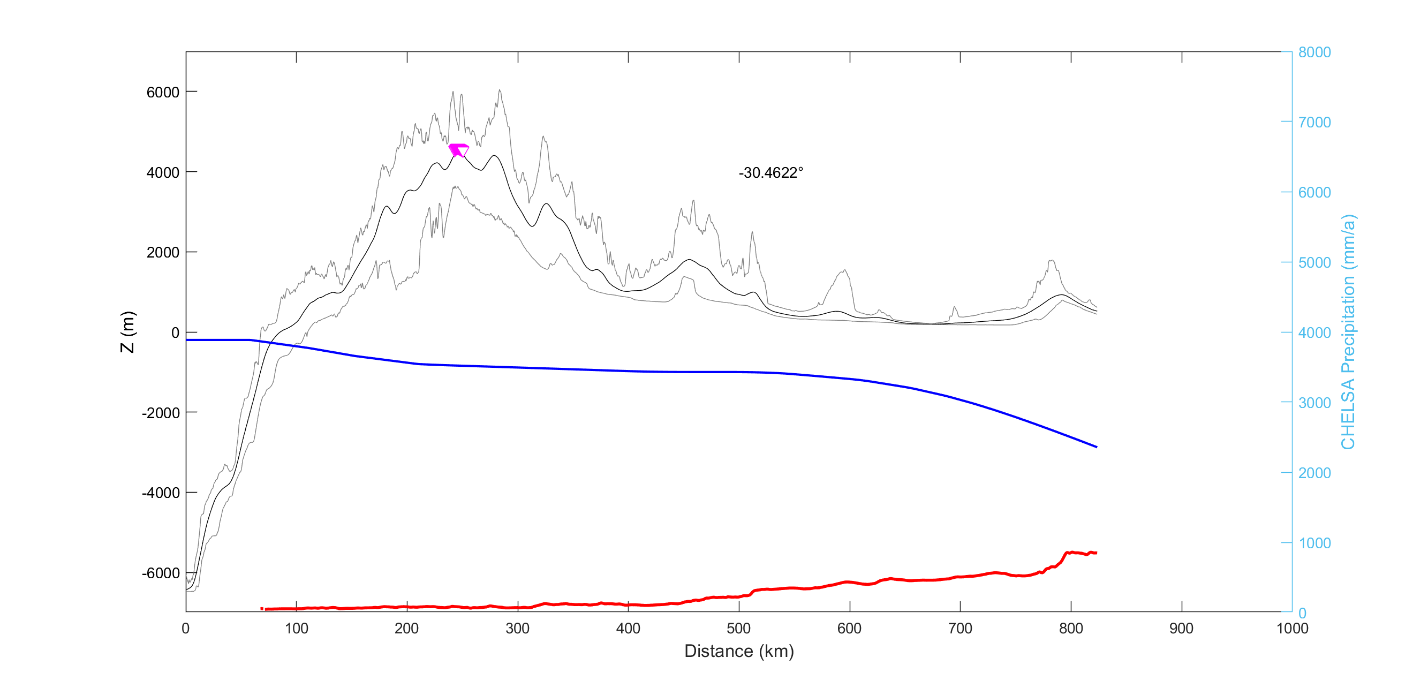

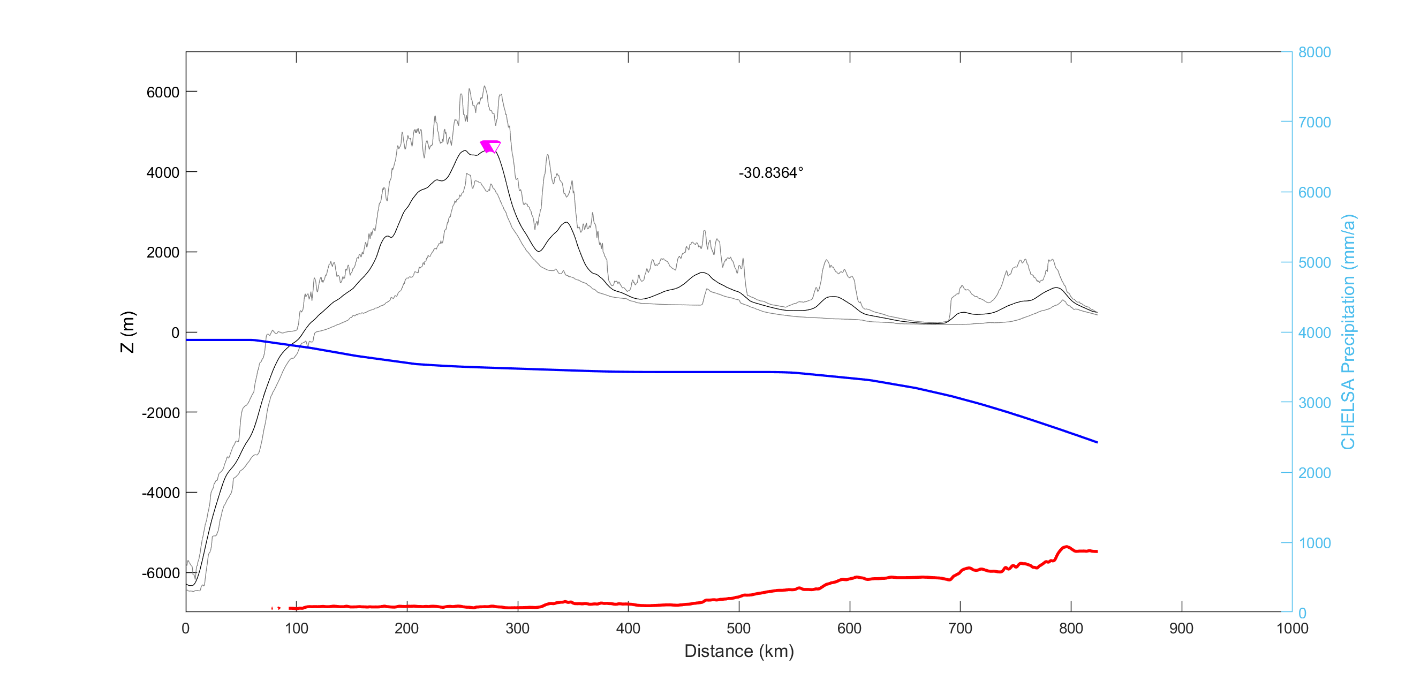

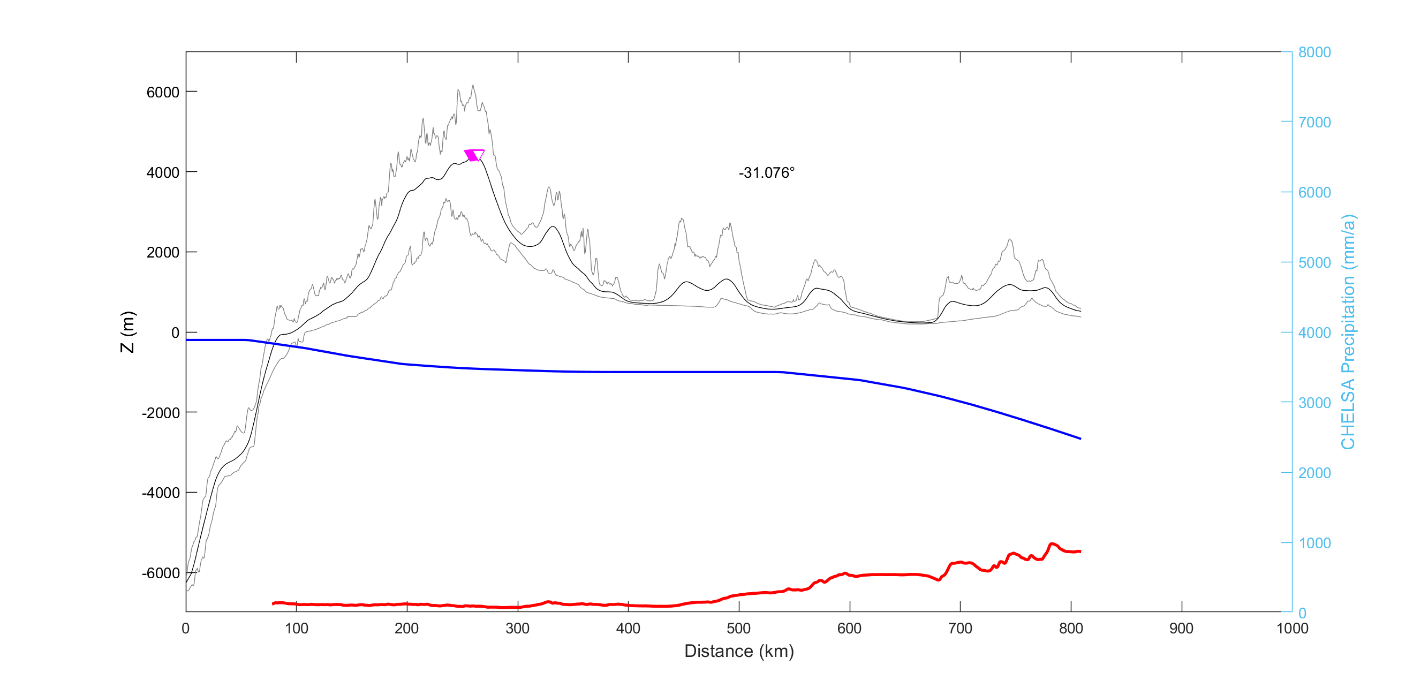

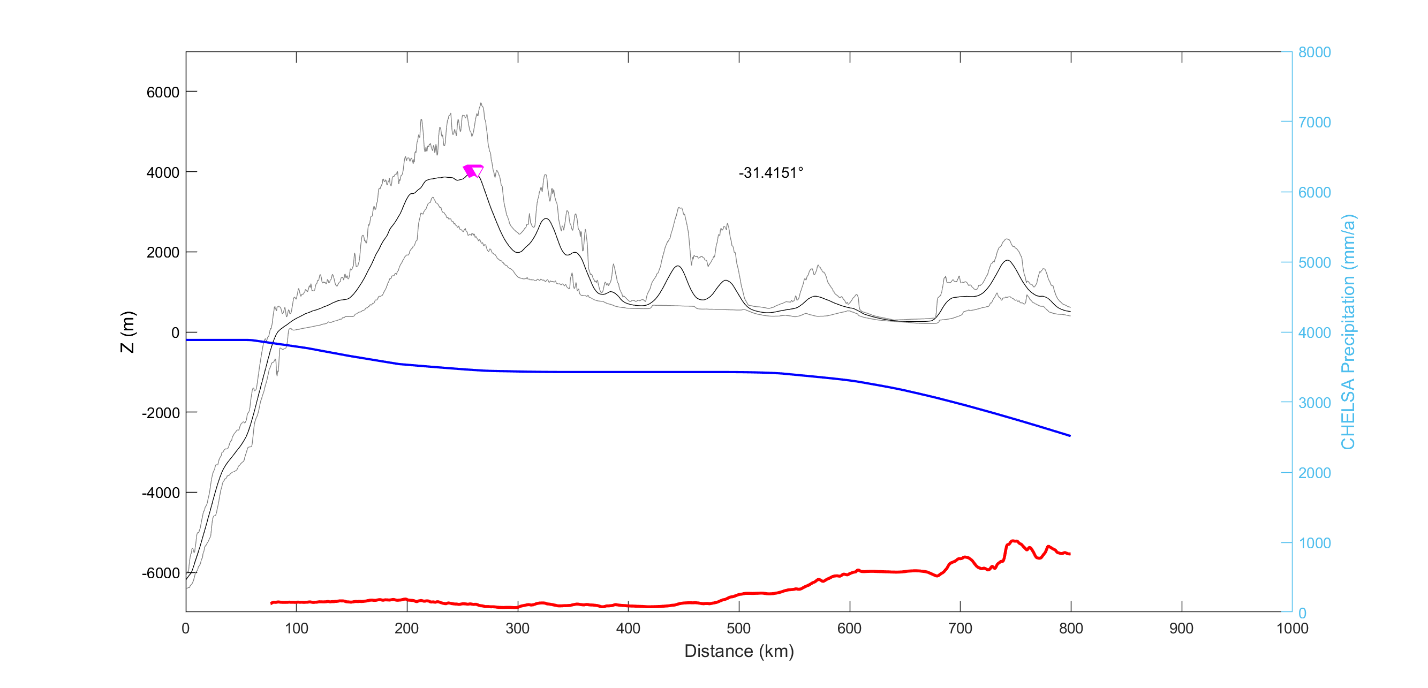

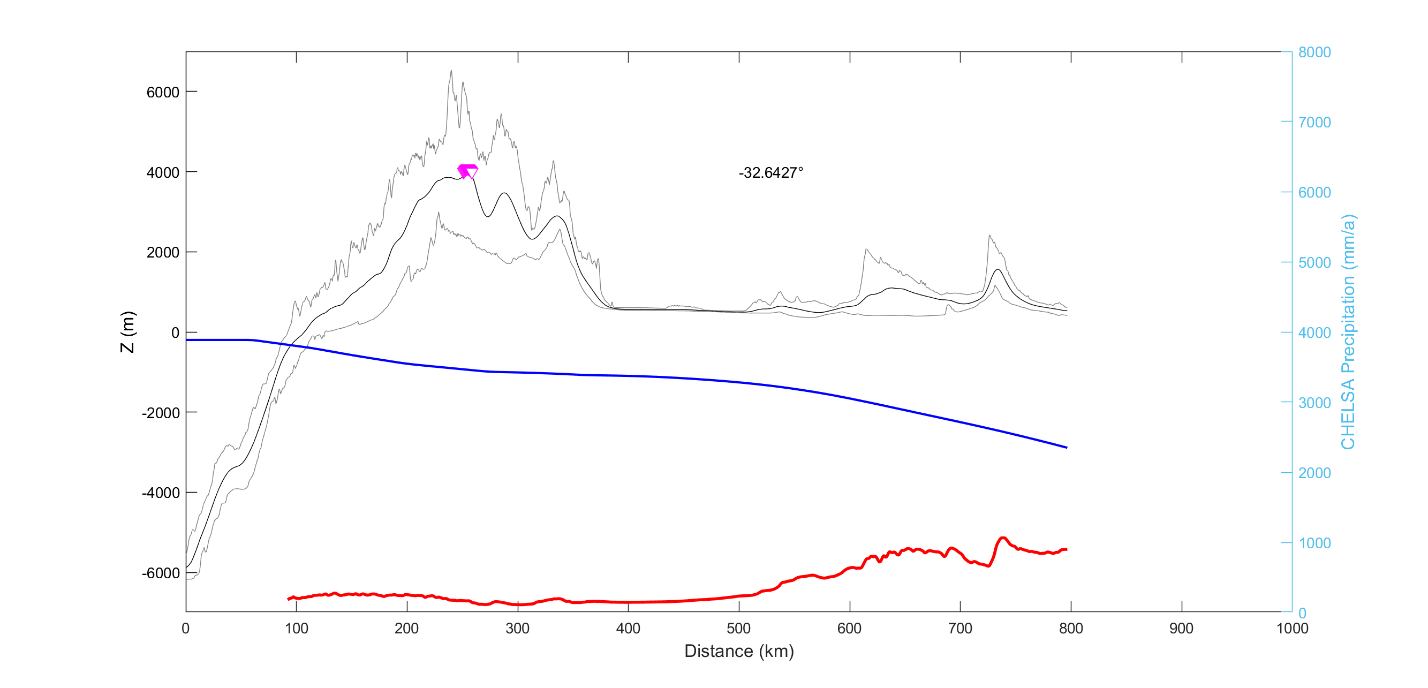

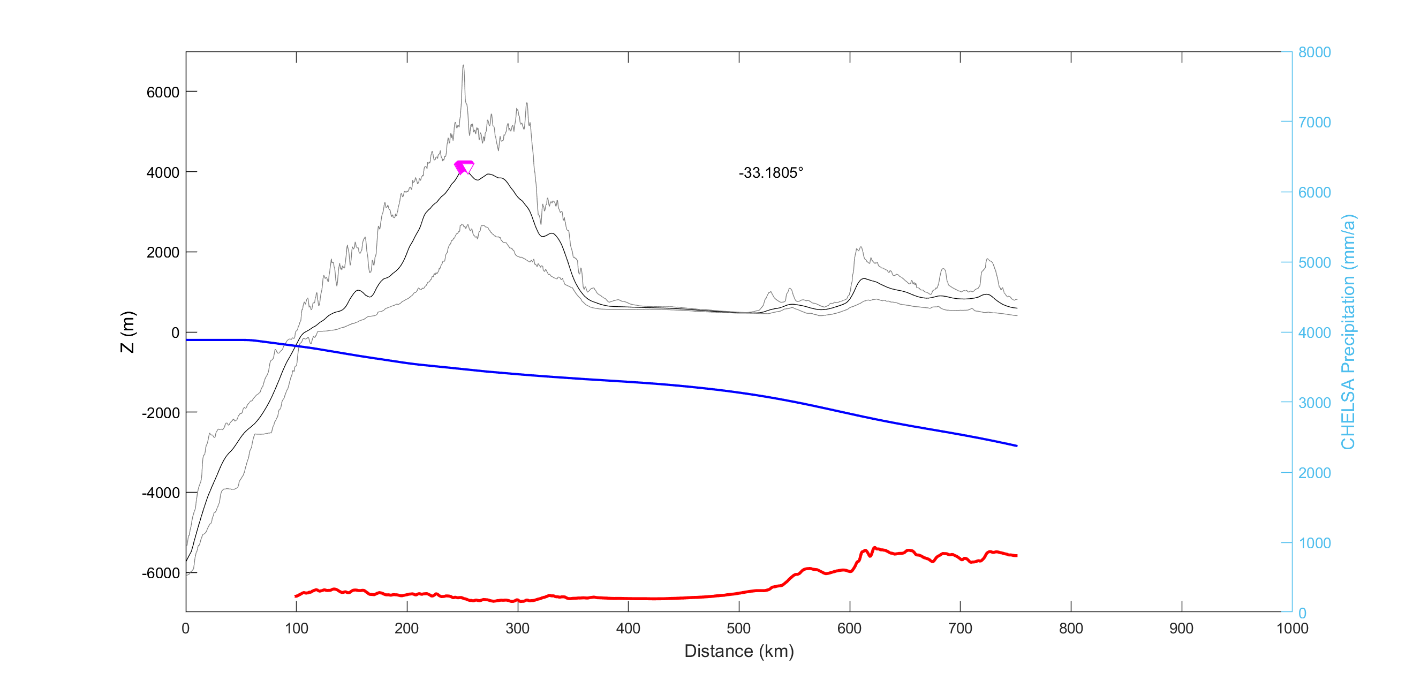

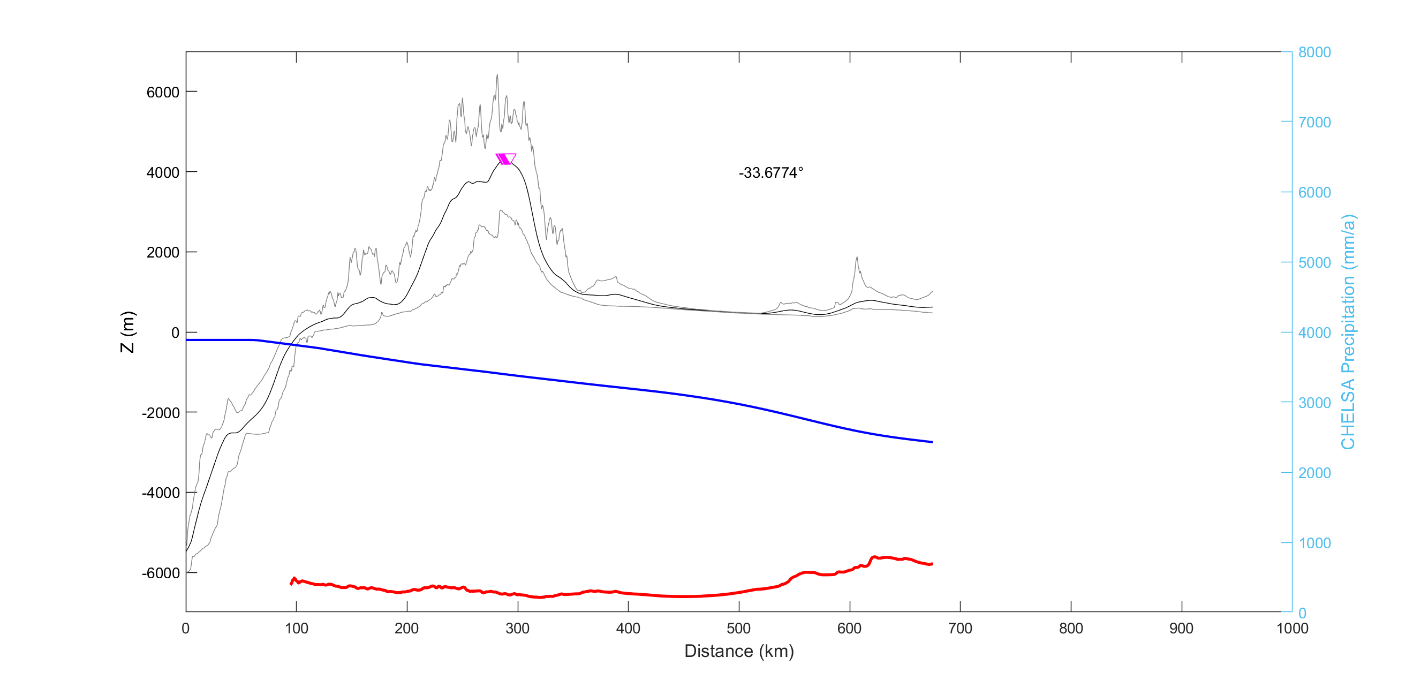

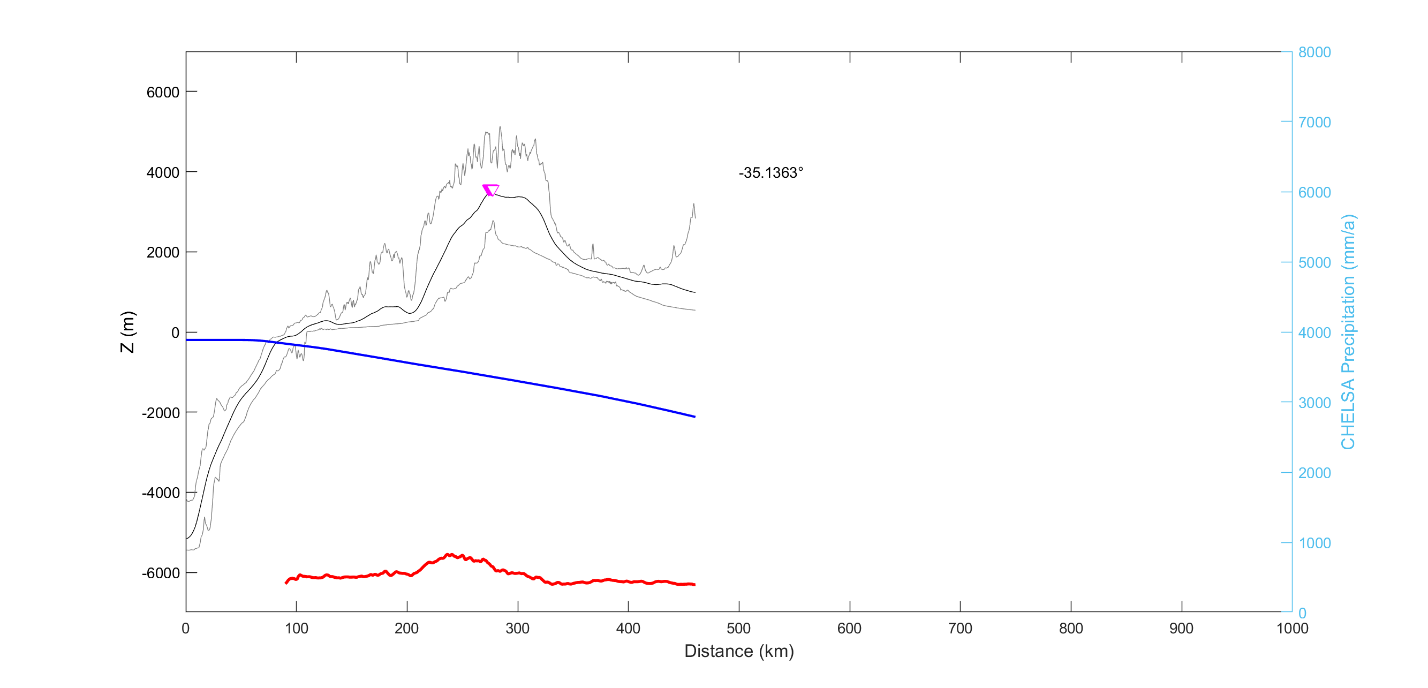

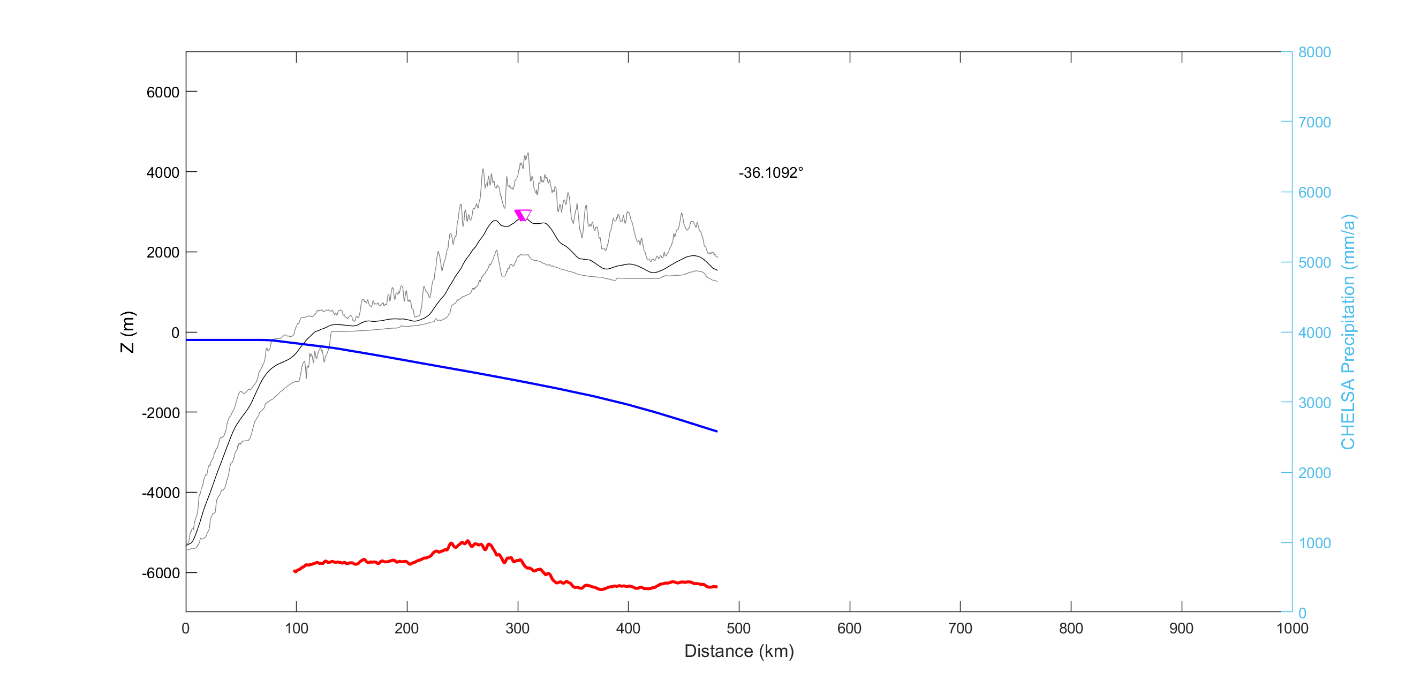

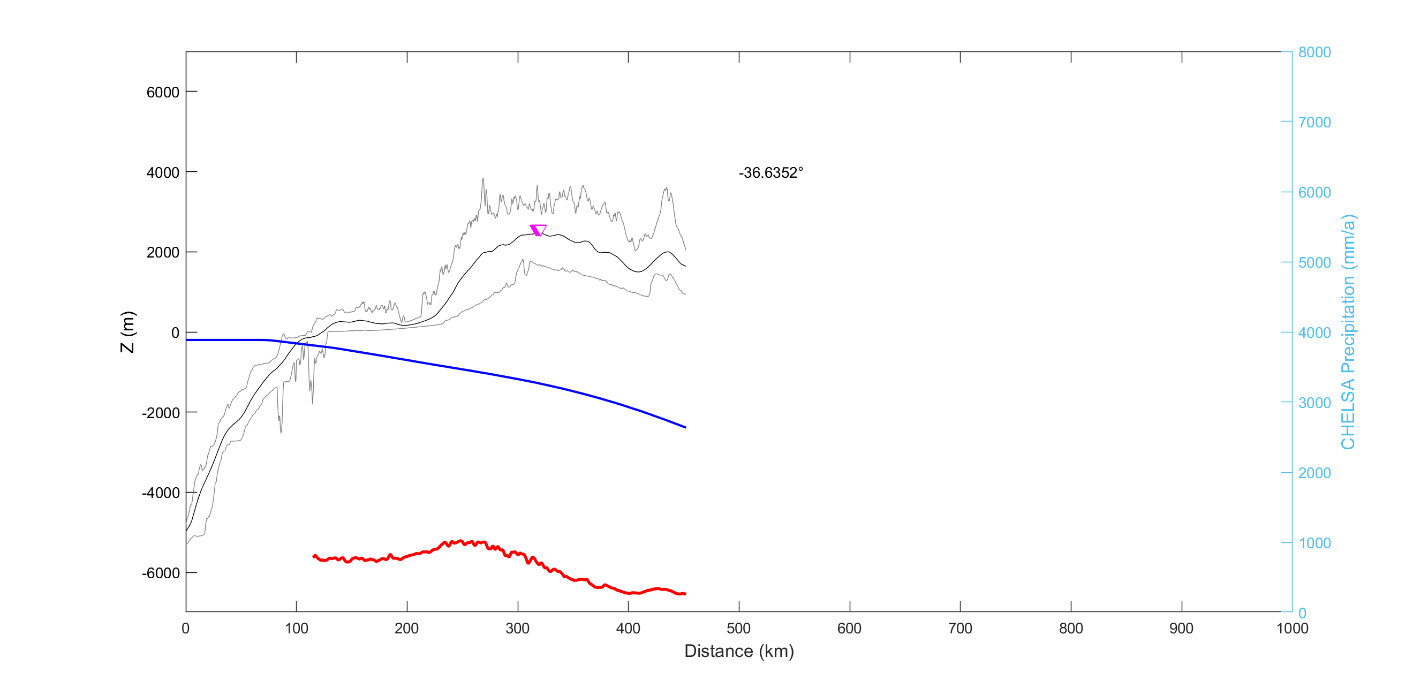

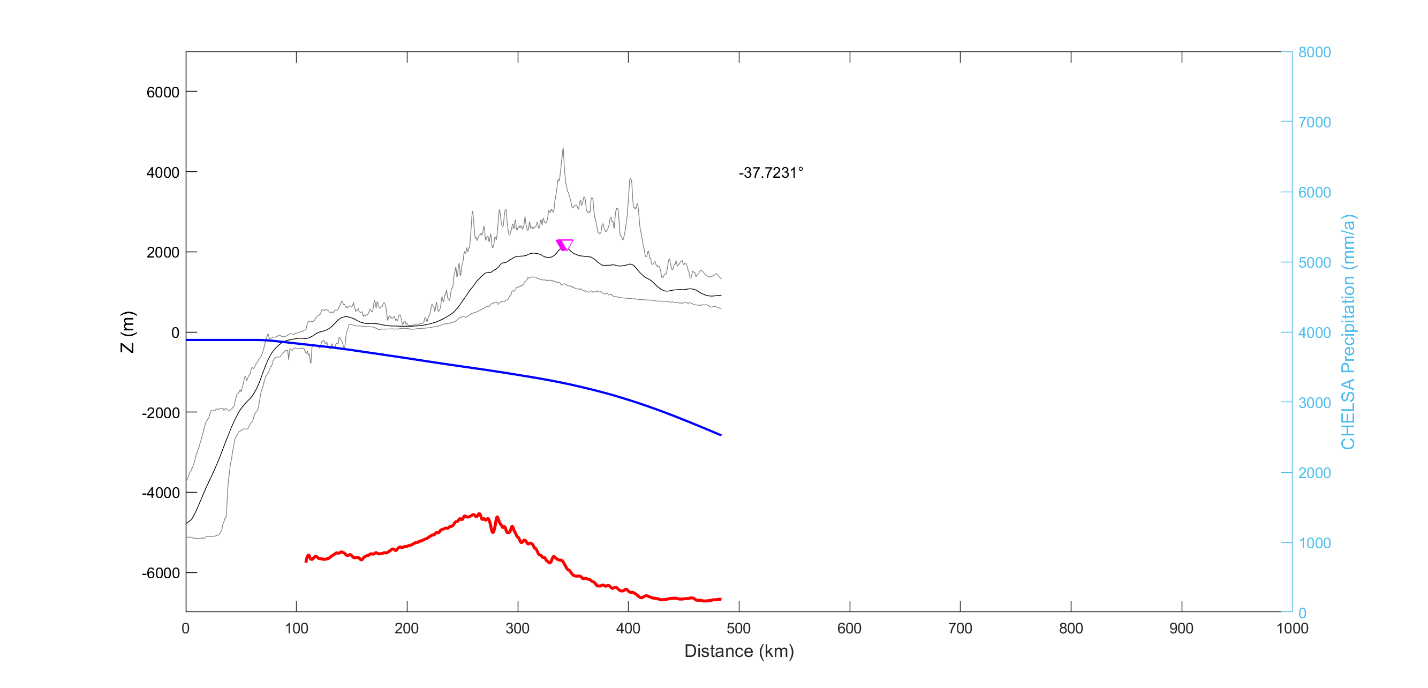

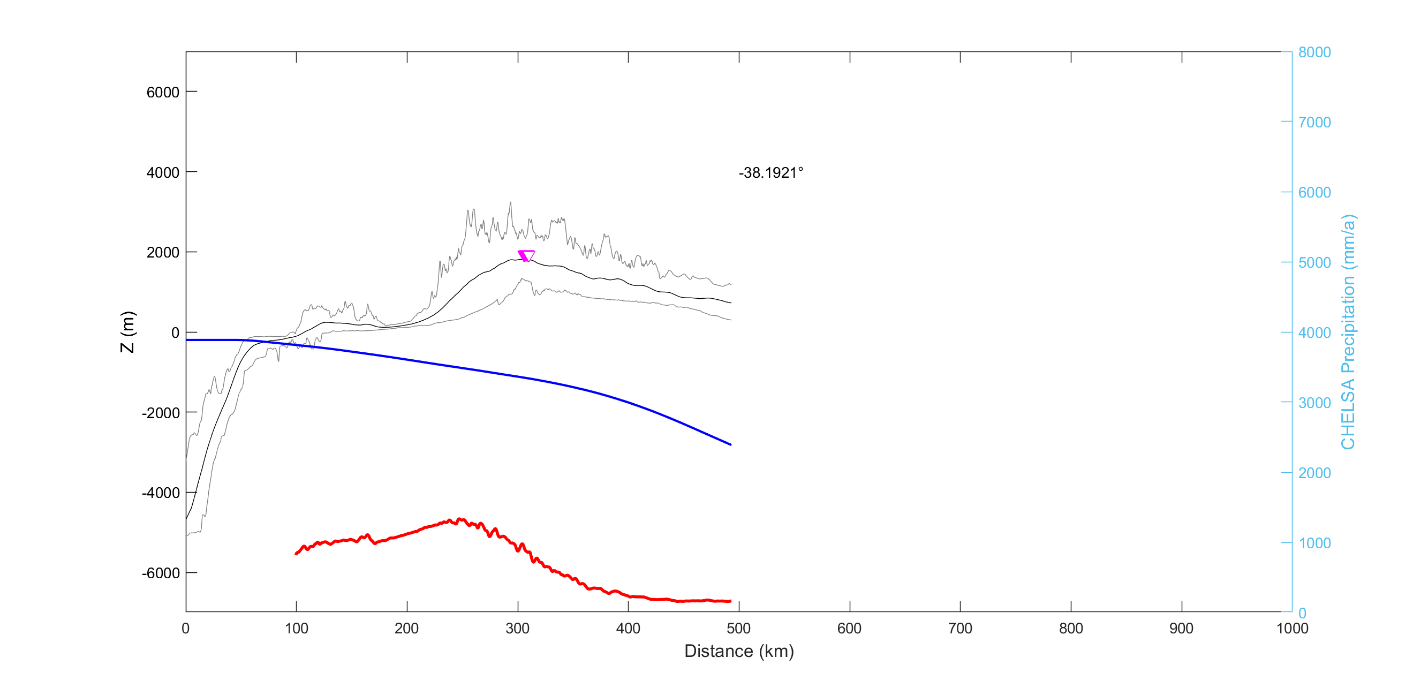

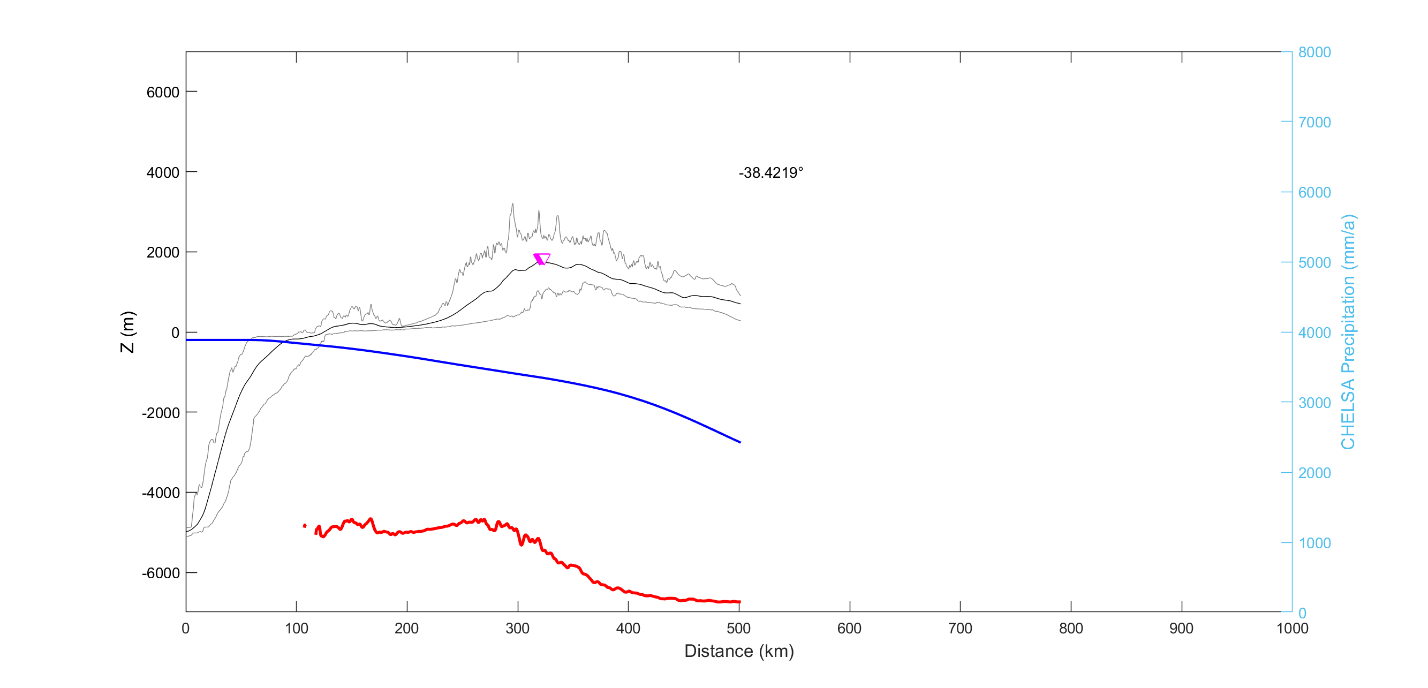

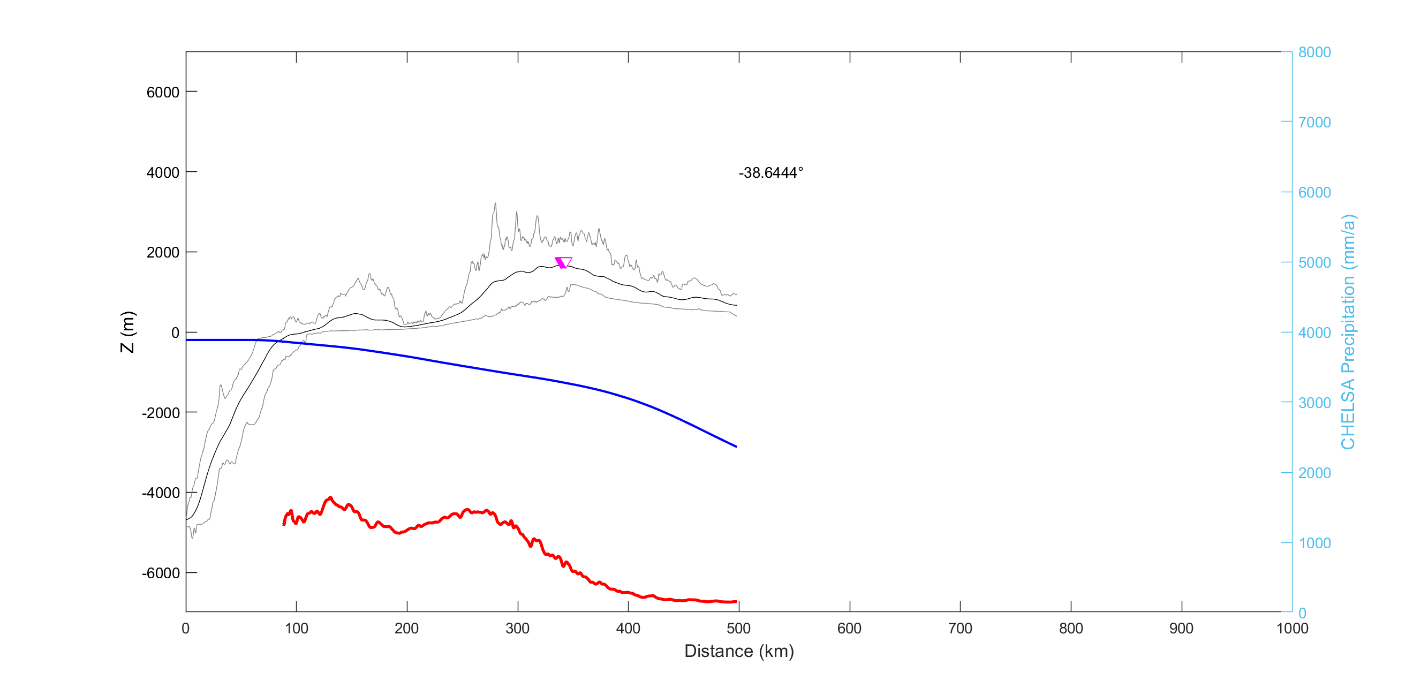

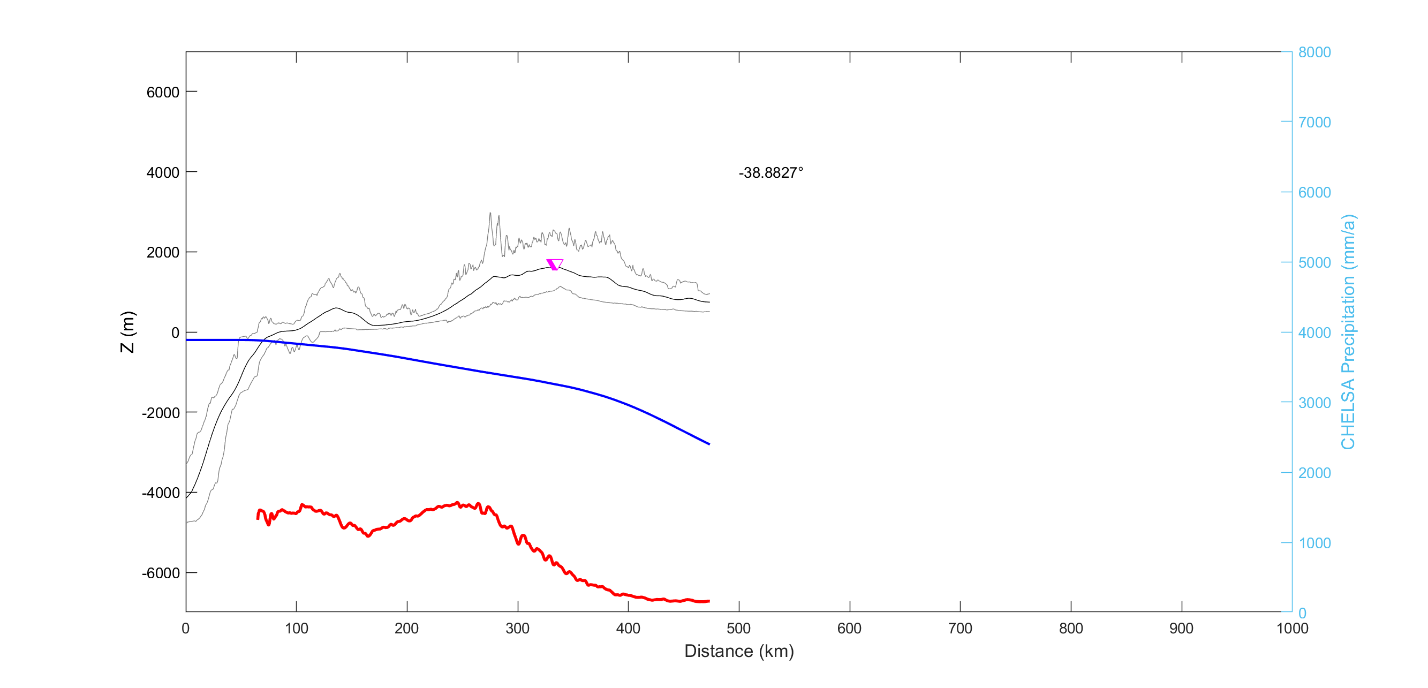

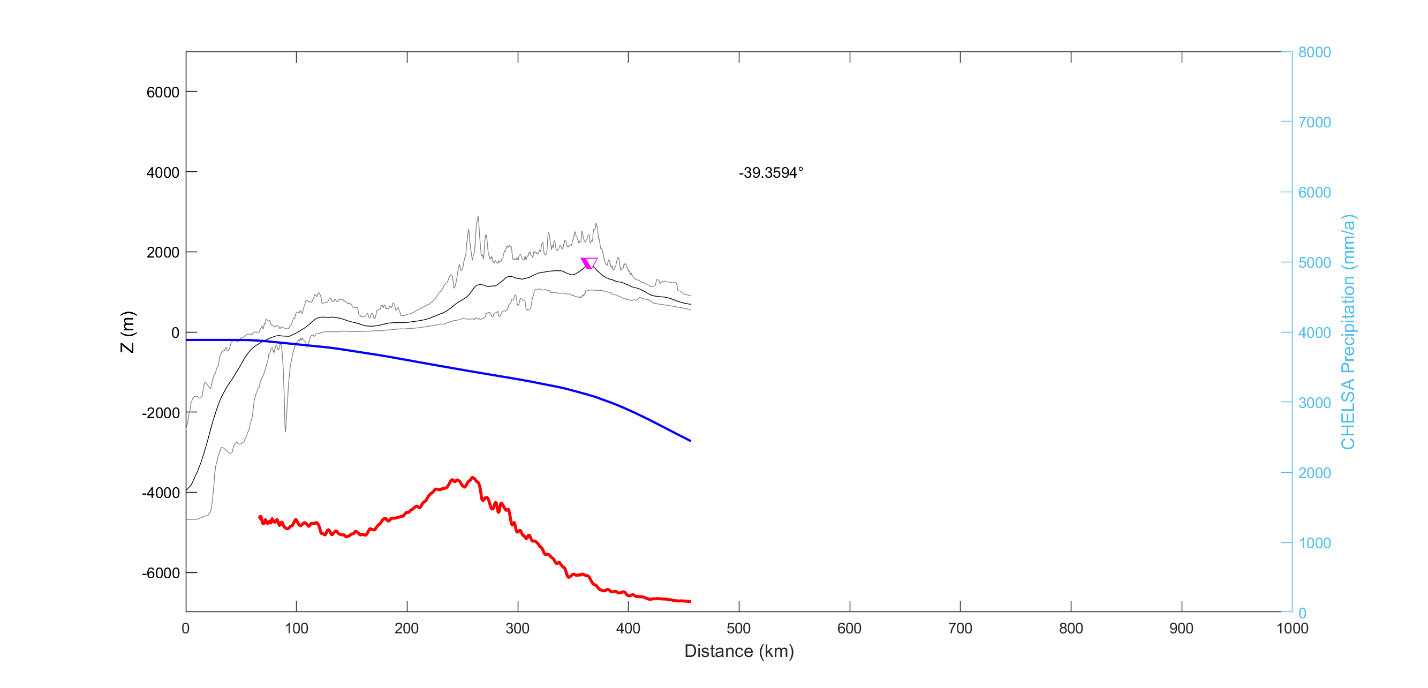

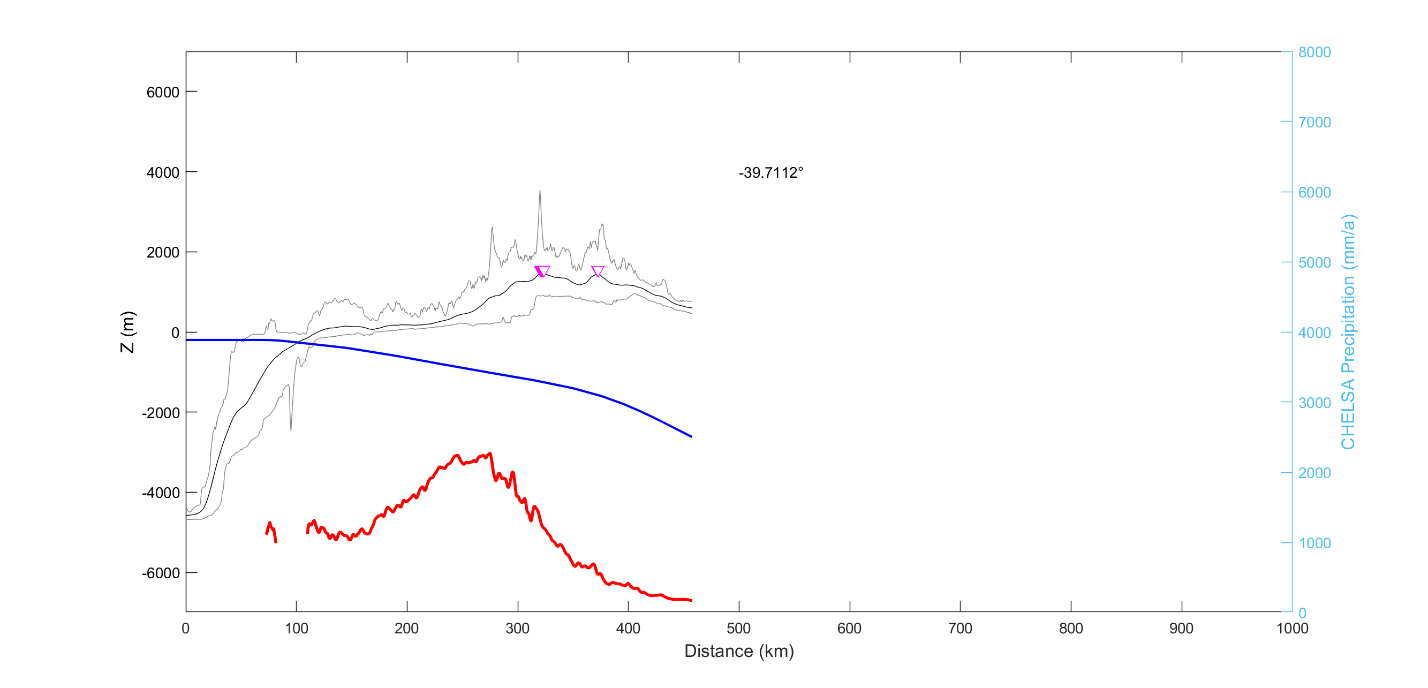

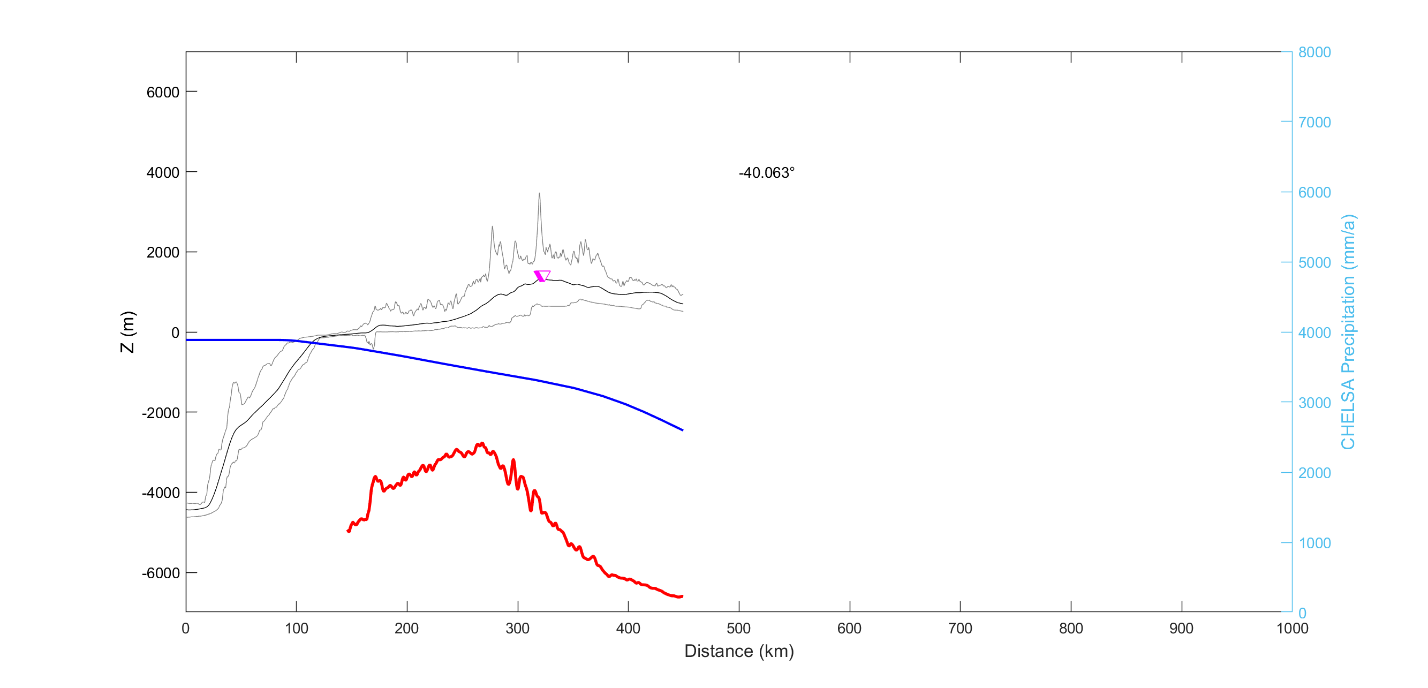

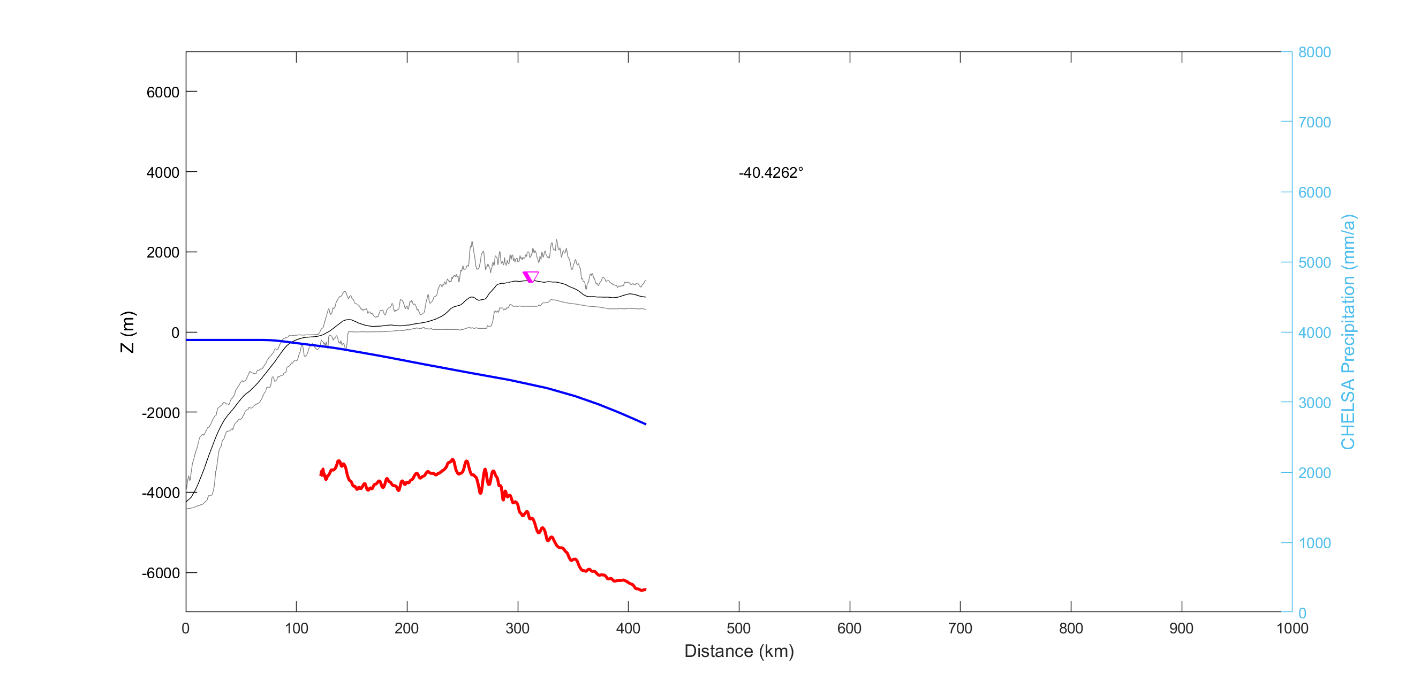

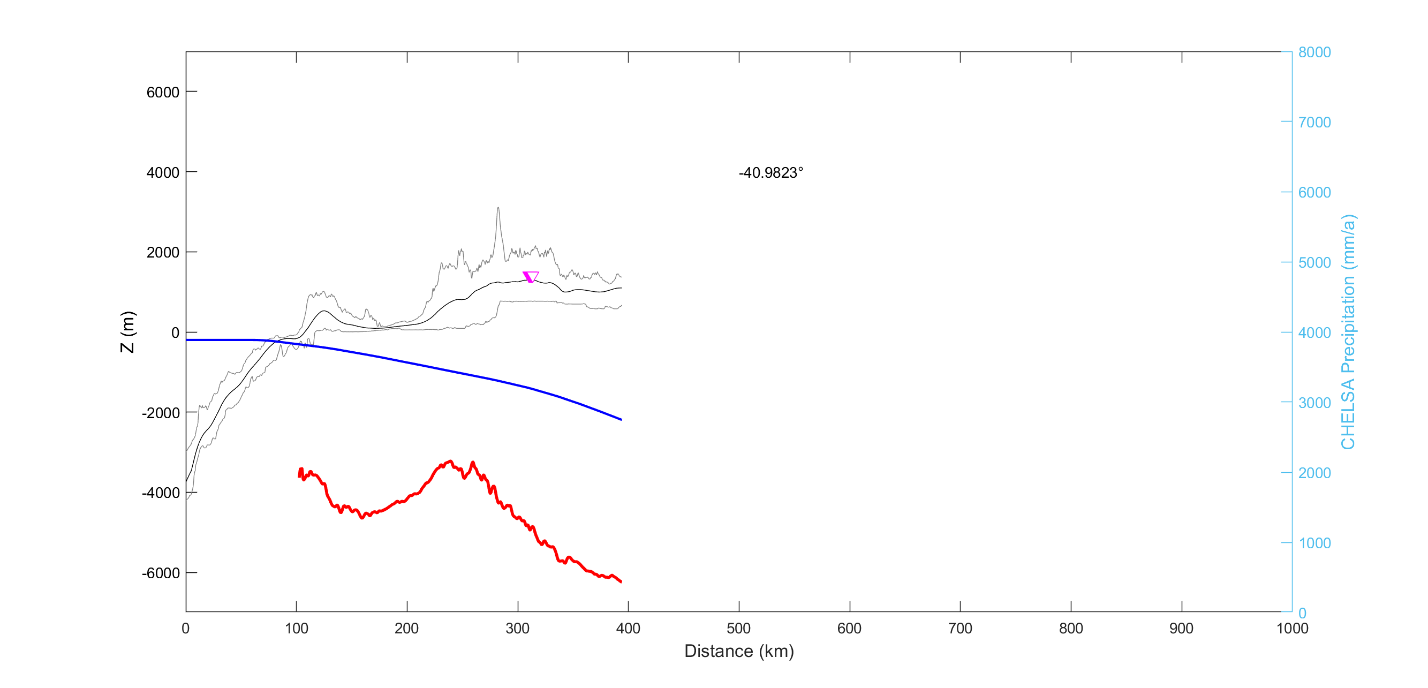

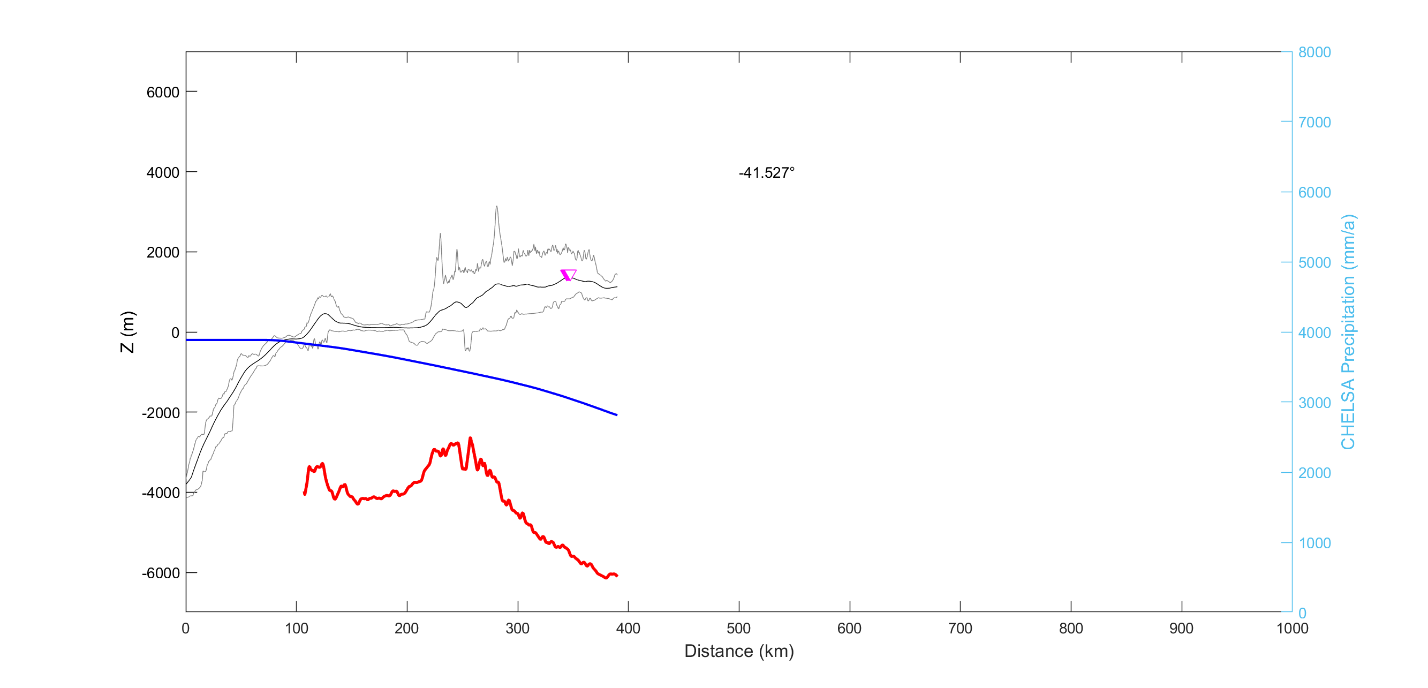

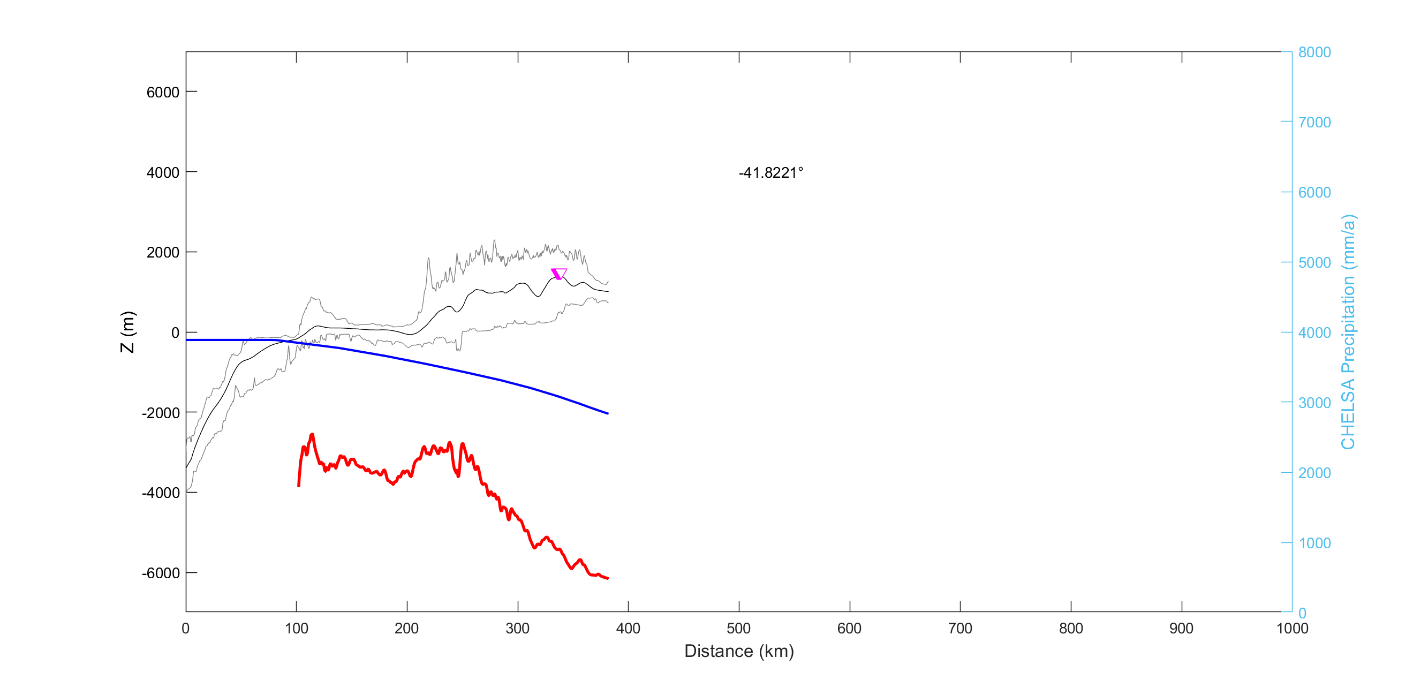

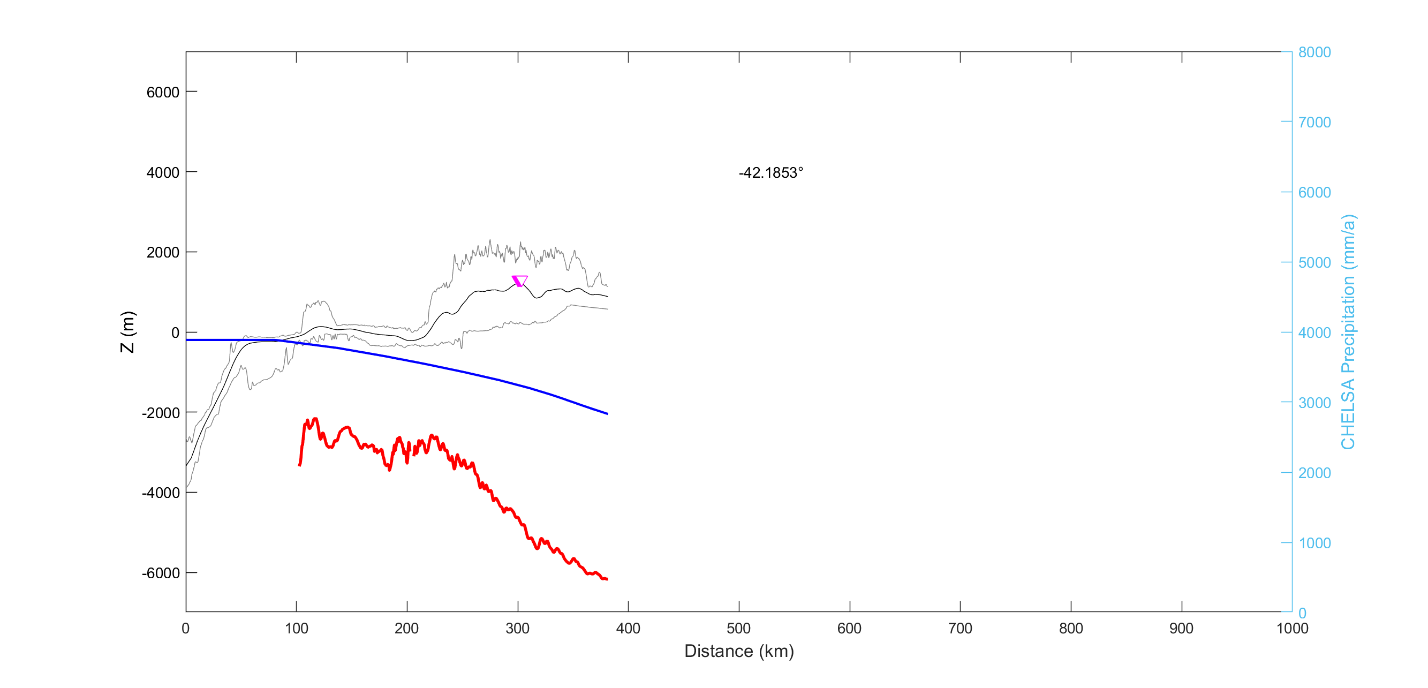

Supplement: Supplementary file 1 [file 1]
